# Supplementary material for: Flora of Vladimir Oblast, Russia: an updated grid dataset (1867–2020)
Source: Biodivers Data J. 2021 May 28;9:e68046. doi: 10.3897/BDJ.9.e68046 (PMC8178294; doi:10.3897/BDJ.9.e68046)
Supplement: Supplementary material 1 — A grid scheme used for "Flora of Vladimir Oblast, Russia" dataset [file bdj-09-e68046-s001.kml]

<?xml version="1.0" encoding="UTF-8"?>
<kml xmlns="http://www.opengis.net/kml/2.2">
  <Document>
    <name>Основа проекта сеточного картирования флоры Владимирской области</name>
    <description>Это регулярная сетка квадратов, по которой ведётся сбор флористических данных. Она основана на градусной сетке с шагом 5 минут по широте (север - юг) и 10 минут по долготе (запад - восток). Таким образом, средняя площадь квадратов около 96 кв. км. При наведении мышкой на необходимый квадрат и одиночном клике возникает индекс квадрата (кириллическая буква и номер). Квадратов много (336), они показаны на карте начиная с северных, поэтому для привязки сборов в более южных районах области необходимо перескакивать на следующие странички внизу этой легенды (всего 5 страниц). Эта система индексов унифицирована для двух проектов - картирования сосудистых растений (А. Серёгин) и мохообразных (Ю. Кокошникова)</description>
    <Style id="poly-000000-1000-0-normal">
      <LineStyle>
        <color>ff000000</color>
        <width>1</width>
      </LineStyle>
      <PolyStyle>
        <color>00000000</color>
        <fill>1</fill>
        <outline>1</outline>
      </PolyStyle>
    </Style>
    <Style id="poly-000000-1000-0-highlight">
      <LineStyle>
        <color>ff000000</color>
        <width>1.5</width>
      </LineStyle>
      <PolyStyle>
        <color>00000000</color>
        <fill>1</fill>
        <outline>1</outline>
      </PolyStyle>
    </Style>
    <StyleMap id="poly-000000-1000-0">
      <Pair>
        <key>normal</key>
        <styleUrl>#poly-000000-1000-0-normal</styleUrl>
      </Pair>
      <Pair>
        <key>highlight</key>
        <styleUrl>#poly-000000-1000-0-highlight</styleUrl>
      </Pair>
    </StyleMap>
    <Folder>
      <name>Слой без названия</name>
      <Placemark>
        <name>А1</name>
        <description>Квадрат А1</description>
        <styleUrl>#poly-000000-1000-0</styleUrl>
        <Polygon>
          <outerBoundaryIs>
            <LinearRing>
              <tessellate>1</tessellate>
              <coordinates>
                39.5,56.75,0
                39.6667,56.75,0
                39.6667,56.8333,0
                39.5,56.8333,0
                39.5,56.75,0
              </coordinates>
            </LinearRing>
          </outerBoundaryIs>
        </Polygon>
      </Placemark>
      <Placemark>
        <name>А2</name>
        <description>Квадрат А2</description>
        <styleUrl>#poly-000000-1000-0</styleUrl>
        <Polygon>
          <outerBoundaryIs>
            <LinearRing>
              <tessellate>1</tessellate>
              <coordinates>
                39.6667,56.75,0
                39.8333,56.75,0
                39.8333,56.8333,0
                39.6667,56.8333,0
                39.6667,56.75,0
              </coordinates>
            </LinearRing>
          </outerBoundaryIs>
        </Polygon>
      </Placemark>
      <Placemark>
        <name>А3</name>
        <description>Квадрат А3</description>
        <styleUrl>#poly-000000-1000-0</styleUrl>
        <Polygon>
          <outerBoundaryIs>
            <LinearRing>
              <tessellate>1</tessellate>
              <coordinates>
                39.8333,56.7083,0
                40,56.7083,0
                40,56.7917,0
                39.8333,56.7917,0
                39.8333,56.7083,0
              </coordinates>
            </LinearRing>
          </outerBoundaryIs>
        </Polygon>
      </Placemark>
      <Placemark>
        <name>Б1</name>
        <description>Квадрат Б1</description>
        <styleUrl>#poly-000000-1000-0</styleUrl>
        <Polygon>
          <outerBoundaryIs>
            <LinearRing>
              <tessellate>1</tessellate>
              <coordinates>
                39.3333,56.6667,0
                39.5,56.6667,0
                39.5,56.75,0
                39.3333,56.75,0
                39.3333,56.6667,0
              </coordinates>
            </LinearRing>
          </outerBoundaryIs>
        </Polygon>
      </Placemark>
      <Placemark>
        <name>Б2</name>
        <description>Квадрат Б2</description>
        <styleUrl>#poly-000000-1000-0</styleUrl>
        <Polygon>
          <outerBoundaryIs>
            <LinearRing>
              <tessellate>1</tessellate>
              <coordinates>
                39.5,56.6667,0
                39.6667,56.6667,0
                39.6667,56.75,0
                39.5,56.75,0
                39.5,56.6667,0
              </coordinates>
            </LinearRing>
          </outerBoundaryIs>
        </Polygon>
      </Placemark>
      <Placemark>
        <name>Б3</name>
        <description>Квадрат Б3</description>
        <styleUrl>#poly-000000-1000-0</styleUrl>
        <Polygon>
          <outerBoundaryIs>
            <LinearRing>
              <tessellate>1</tessellate>
              <coordinates>
                39.6667,56.6667,0
                39.8333,56.6667,0
                39.8333,56.75,0
                39.6667,56.75,0
                39.6667,56.6667,0
              </coordinates>
            </LinearRing>
          </outerBoundaryIs>
        </Polygon>
      </Placemark>
      <Placemark>
        <name>Б4</name>
        <description>Квадрат Б4</description>
        <styleUrl>#poly-000000-1000-0</styleUrl>
        <Polygon>
          <outerBoundaryIs>
            <LinearRing>
              <tessellate>1</tessellate>
              <coordinates>
                39.8333,56.625,0
                40,56.625,0
                40,56.7083,0
                39.8333,56.7083,0
                39.8333,56.625,0
              </coordinates>
            </LinearRing>
          </outerBoundaryIs>
        </Polygon>
      </Placemark>
      <Placemark>
        <name>В1</name>
        <description>Квадрат В1</description>
        <styleUrl>#poly-000000-1000-0</styleUrl>
        <Polygon>
          <outerBoundaryIs>
            <LinearRing>
              <tessellate>1</tessellate>
              <coordinates>
                38.3333,56.5833,0
                38.5,56.5833,0
                38.5,56.6667,0
                38.3333,56.6667,0
                38.3333,56.5833,0
              </coordinates>
            </LinearRing>
          </outerBoundaryIs>
        </Polygon>
      </Placemark>
      <Placemark>
        <name>В2</name>
        <description>Квадрат В2</description>
        <styleUrl>#poly-000000-1000-0</styleUrl>
        <Polygon>
          <outerBoundaryIs>
            <LinearRing>
              <tessellate>1</tessellate>
              <coordinates>
                38.5,56.5833,0
                38.6667,56.5833,0
                38.6667,56.6667,0
                38.5,56.6667,0
                38.5,56.5833,0
              </coordinates>
            </LinearRing>
          </outerBoundaryIs>
        </Polygon>
      </Placemark>
      <Placemark>
        <name>В3</name>
        <description>Квадрат В3</description>
        <styleUrl>#poly-000000-1000-0</styleUrl>
        <Polygon>
          <outerBoundaryIs>
            <LinearRing>
              <tessellate>1</tessellate>
              <coordinates>
                39.3333,56.5833,0
                39.5,56.5833,0
                39.5,56.6667,0
                39.3333,56.6667,0
                39.3333,56.5833,0
              </coordinates>
            </LinearRing>
          </outerBoundaryIs>
        </Polygon>
      </Placemark>
      <Placemark>
        <name>В4</name>
        <description>Квадрат В4</description>
        <styleUrl>#poly-000000-1000-0</styleUrl>
        <Polygon>
          <outerBoundaryIs>
            <LinearRing>
              <tessellate>1</tessellate>
              <coordinates>
                39.5,56.5833,0
                39.6667,56.5833,0
                39.6667,56.6667,0
                39.5,56.6667,0
                39.5,56.5833,0
              </coordinates>
            </LinearRing>
          </outerBoundaryIs>
        </Polygon>
      </Placemark>
      <Placemark>
        <name>В5</name>
        <description>Квадрат В5</description>
        <styleUrl>#poly-000000-1000-0</styleUrl>
        <Polygon>
          <outerBoundaryIs>
            <LinearRing>
              <tessellate>1</tessellate>
              <coordinates>
                39.6667,56.5833,0
                39.8333,56.5833,0
                39.8333,56.6667,0
                39.6667,56.6667,0
                39.6667,56.5833,0
              </coordinates>
            </LinearRing>
          </outerBoundaryIs>
        </Polygon>
      </Placemark>
      <Placemark>
        <name>Г1</name>
        <description>Квадрат Г1</description>
        <styleUrl>#poly-000000-1000-0</styleUrl>
        <Polygon>
          <outerBoundaryIs>
            <LinearRing>
              <tessellate>1</tessellate>
              <coordinates>
                38.1667,56.5,0
                38.3333,56.5,0
                38.3333,56.5833,0
                38.1667,56.5833,0
                38.1667,56.5,0
              </coordinates>
            </LinearRing>
          </outerBoundaryIs>
        </Polygon>
      </Placemark>
      <Placemark>
        <name>Г2</name>
        <description>Квадрат Г2</description>
        <styleUrl>#poly-000000-1000-0</styleUrl>
        <Polygon>
          <outerBoundaryIs>
            <LinearRing>
              <tessellate>1</tessellate>
              <coordinates>
                38.3333,56.5,0
                38.5,56.5,0
                38.5,56.5833,0
                38.3333,56.5833,0
                38.3333,56.5,0
              </coordinates>
            </LinearRing>
          </outerBoundaryIs>
        </Polygon>
      </Placemark>
      <Placemark>
        <name>Г3</name>
        <description>Квадрат Г3</description>
        <styleUrl>#poly-000000-1000-0</styleUrl>
        <Polygon>
          <outerBoundaryIs>
            <LinearRing>
              <tessellate>1</tessellate>
              <coordinates>
                38.5,56.5,0
                38.6667,56.5,0
                38.6667,56.5833,0
                38.5,56.5833,0
                38.5,56.5,0
              </coordinates>
            </LinearRing>
          </outerBoundaryIs>
        </Polygon>
      </Placemark>
      <Placemark>
        <name>Г4</name>
        <description>Квадрат Г4</description>
        <styleUrl>#poly-000000-1000-0</styleUrl>
        <Polygon>
          <outerBoundaryIs>
            <LinearRing>
              <tessellate>1</tessellate>
              <coordinates>
                38.6667,56.5,0
                38.8333,56.5,0
                38.8333,56.5833,0
                38.6667,56.5833,0
                38.6667,56.5,0
              </coordinates>
            </LinearRing>
          </outerBoundaryIs>
        </Polygon>
      </Placemark>
      <Placemark>
        <name>Г5</name>
        <description>Квадрат Г5</description>
        <styleUrl>#poly-000000-1000-0</styleUrl>
        <Polygon>
          <outerBoundaryIs>
            <LinearRing>
              <tessellate>1</tessellate>
              <coordinates>
                38.8333,56.5,0
                39,56.5,0
                39,56.5833,0
                38.8333,56.5833,0
                38.8333,56.5,0
              </coordinates>
            </LinearRing>
          </outerBoundaryIs>
        </Polygon>
      </Placemark>
      <Placemark>
        <name>Г6</name>
        <description>Квадрат Г6</description>
        <styleUrl>#poly-000000-1000-0</styleUrl>
        <Polygon>
          <outerBoundaryIs>
            <LinearRing>
              <tessellate>1</tessellate>
              <coordinates>
                39,56.5,0
                39.1667,56.5,0
                39.1667,56.5833,0
                39,56.5833,0
                39,56.5,0
              </coordinates>
            </LinearRing>
          </outerBoundaryIs>
        </Polygon>
      </Placemark>
      <Placemark>
        <name>Г7</name>
        <description>Квадрат Г7</description>
        <styleUrl>#poly-000000-1000-0</styleUrl>
        <Polygon>
          <outerBoundaryIs>
            <LinearRing>
              <tessellate>1</tessellate>
              <coordinates>
                39.1667,56.5,0
                39.3333,56.5,0
                39.3333,56.5833,0
                39.1667,56.5833,0
                39.1667,56.5,0
              </coordinates>
            </LinearRing>
          </outerBoundaryIs>
        </Polygon>
      </Placemark>
      <Placemark>
        <name>Г8</name>
        <description>Квадрат Г8</description>
        <styleUrl>#poly-000000-1000-0</styleUrl>
        <Polygon>
          <outerBoundaryIs>
            <LinearRing>
              <tessellate>1</tessellate>
              <coordinates>
                39.3333,56.5,0
                39.5,56.5,0
                39.5,56.5833,0
                39.3333,56.5833,0
                39.3333,56.5,0
              </coordinates>
            </LinearRing>
          </outerBoundaryIs>
        </Polygon>
      </Placemark>
      <Placemark>
        <name>Г9</name>
        <description>Квадрат Г9</description>
        <styleUrl>#poly-000000-1000-0</styleUrl>
        <Polygon>
          <outerBoundaryIs>
            <LinearRing>
              <tessellate>1</tessellate>
              <coordinates>
                39.5,56.5,0
                39.6667,56.5,0
                39.6667,56.5833,0
                39.5,56.5833,0
                39.5,56.5,0
              </coordinates>
            </LinearRing>
          </outerBoundaryIs>
        </Polygon>
      </Placemark>
      <Placemark>
        <name>Г10</name>
        <description>Квадрат Г10</description>
        <styleUrl>#poly-000000-1000-0</styleUrl>
        <Polygon>
          <outerBoundaryIs>
            <LinearRing>
              <tessellate>1</tessellate>
              <coordinates>
                39.6667,56.5,0
                39.8333,56.5,0
                39.8333,56.5833,0
                39.6667,56.5833,0
                39.6667,56.5,0
              </coordinates>
            </LinearRing>
          </outerBoundaryIs>
        </Polygon>
      </Placemark>
      <Placemark>
        <name>Г11</name>
        <description>Квадрат Г11</description>
        <styleUrl>#poly-000000-1000-0</styleUrl>
        <Polygon>
          <outerBoundaryIs>
            <LinearRing>
              <tessellate>1</tessellate>
              <coordinates>
                39.8333,56.5,0
                40,56.5,0
                40,56.5833,0
                39.8333,56.5833,0
                39.8333,56.5,0
              </coordinates>
            </LinearRing>
          </outerBoundaryIs>
        </Polygon>
      </Placemark>
      <Placemark>
        <name>Г12</name>
        <description>Квадрат Г12</description>
        <styleUrl>#poly-000000-1000-0</styleUrl>
        <Polygon>
          <outerBoundaryIs>
            <LinearRing>
              <tessellate>1</tessellate>
              <coordinates>
                40.3333,56.5,0
                40.5,56.5,0
                40.5,56.5833,0
                40.3333,56.5833,0
                40.3333,56.5,0
              </coordinates>
            </LinearRing>
          </outerBoundaryIs>
        </Polygon>
      </Placemark>
      <Placemark>
        <name>Г13</name>
        <description>Квадрат Г13</description>
        <styleUrl>#poly-000000-1000-0</styleUrl>
        <Polygon>
          <outerBoundaryIs>
            <LinearRing>
              <tessellate>1</tessellate>
              <coordinates>
                40.5,56.5,0
                40.6667,56.5,0
                40.6667,56.5833,0
                40.5,56.5833,0
                40.5,56.5,0
              </coordinates>
            </LinearRing>
          </outerBoundaryIs>
        </Polygon>
      </Placemark>
      <Placemark>
        <name>Г14</name>
        <description>Квадрат Г14</description>
        <styleUrl>#poly-000000-1000-0</styleUrl>
        <Polygon>
          <outerBoundaryIs>
            <LinearRing>
              <tessellate>1</tessellate>
              <coordinates>
                40.6667,56.5,0
                40.8333,56.5,0
                40.8333,56.5833,0
                40.6667,56.5833,0
                40.6667,56.5,0
              </coordinates>
            </LinearRing>
          </outerBoundaryIs>
        </Polygon>
      </Placemark>
      <Placemark>
        <name>Г15</name>
        <description>Квадрат Г15</description>
        <styleUrl>#poly-000000-1000-0</styleUrl>
        <Polygon>
          <outerBoundaryIs>
            <LinearRing>
              <tessellate>1</tessellate>
              <coordinates>
                40.8333,56.5,0
                41,56.5,0
                41,56.5833,0
                40.8333,56.5833,0
                40.8333,56.5,0
              </coordinates>
            </LinearRing>
          </outerBoundaryIs>
        </Polygon>
      </Placemark>
      <Placemark>
        <name>Г16</name>
        <description>Квадрат Г16</description>
        <styleUrl>#poly-000000-1000-0</styleUrl>
        <Polygon>
          <outerBoundaryIs>
            <LinearRing>
              <tessellate>1</tessellate>
              <coordinates>
                41.8333,56.5,0
                42,56.5,0
                42,56.5833,0
                41.8333,56.5833,0
                41.8333,56.5,0
              </coordinates>
            </LinearRing>
          </outerBoundaryIs>
        </Polygon>
      </Placemark>
      <Placemark>
        <name>Д1</name>
        <description>Квадрат Д1</description>
        <styleUrl>#poly-000000-1000-0</styleUrl>
        <Polygon>
          <outerBoundaryIs>
            <LinearRing>
              <tessellate>1</tessellate>
              <coordinates>
                38.3333,56.4167,0
                38.5,56.4167,0
                38.5,56.5,0
                38.3333,56.5,0
                38.3333,56.4167,0
              </coordinates>
            </LinearRing>
          </outerBoundaryIs>
        </Polygon>
      </Placemark>
      <Placemark>
        <name>Д2</name>
        <description>Квадрат Д2</description>
        <styleUrl>#poly-000000-1000-0</styleUrl>
        <Polygon>
          <outerBoundaryIs>
            <LinearRing>
              <tessellate>1</tessellate>
              <coordinates>
                38.5,56.4167,0
                38.6667,56.4167,0
                38.6667,56.5,0
                38.5,56.5,0
                38.5,56.4167,0
              </coordinates>
            </LinearRing>
          </outerBoundaryIs>
        </Polygon>
      </Placemark>
      <Placemark>
        <name>Д3</name>
        <description>Квадрат Д3</description>
        <styleUrl>#poly-000000-1000-0</styleUrl>
        <Polygon>
          <outerBoundaryIs>
            <LinearRing>
              <tessellate>1</tessellate>
              <coordinates>
                38.6667,56.4167,0
                38.8333,56.4167,0
                38.8333,56.5,0
                38.6667,56.5,0
                38.6667,56.4167,0
              </coordinates>
            </LinearRing>
          </outerBoundaryIs>
        </Polygon>
      </Placemark>
      <Placemark>
        <name>Д4</name>
        <description>Квадрат Д4</description>
        <styleUrl>#poly-000000-1000-0</styleUrl>
        <Polygon>
          <outerBoundaryIs>
            <LinearRing>
              <tessellate>1</tessellate>
              <coordinates>
                38.8333,56.4167,0
                39,56.4167,0
                39,56.5,0
                38.8333,56.5,0
                38.8333,56.4167,0
              </coordinates>
            </LinearRing>
          </outerBoundaryIs>
        </Polygon>
      </Placemark>
      <Placemark>
        <name>Д5</name>
        <description>Квадрат Д5</description>
        <styleUrl>#poly-000000-1000-0</styleUrl>
        <Polygon>
          <outerBoundaryIs>
            <LinearRing>
              <tessellate>1</tessellate>
              <coordinates>
                39,56.4167,0
                39.1667,56.4167,0
                39.1667,56.5,0
                39,56.5,0
                39,56.4167,0
              </coordinates>
            </LinearRing>
          </outerBoundaryIs>
        </Polygon>
      </Placemark>
      <Placemark>
        <name>Д6</name>
        <description>Квадрат Д6</description>
        <styleUrl>#poly-000000-1000-0</styleUrl>
        <Polygon>
          <outerBoundaryIs>
            <LinearRing>
              <tessellate>1</tessellate>
              <coordinates>
                39.1667,56.4167,0
                39.3333,56.4167,0
                39.3333,56.5,0
                39.1667,56.5,0
                39.1667,56.4167,0
              </coordinates>
            </LinearRing>
          </outerBoundaryIs>
        </Polygon>
      </Placemark>
      <Placemark>
        <name>Д7</name>
        <description>Квадрат Д7</description>
        <styleUrl>#poly-000000-1000-0</styleUrl>
        <Polygon>
          <outerBoundaryIs>
            <LinearRing>
              <tessellate>1</tessellate>
              <coordinates>
                39.3333,56.4167,0
                39.5,56.4167,0
                39.5,56.5,0
                39.3333,56.5,0
                39.3333,56.4167,0
              </coordinates>
            </LinearRing>
          </outerBoundaryIs>
        </Polygon>
      </Placemark>
      <Placemark>
        <name>Д8</name>
        <description>Квадрат Д8</description>
        <styleUrl>#poly-000000-1000-0</styleUrl>
        <Polygon>
          <outerBoundaryIs>
            <LinearRing>
              <tessellate>1</tessellate>
              <coordinates>
                39.5,56.4167,0
                39.6667,56.4167,0
                39.6667,56.5,0
                39.5,56.5,0
                39.5,56.4167,0
              </coordinates>
            </LinearRing>
          </outerBoundaryIs>
        </Polygon>
      </Placemark>
      <Placemark>
        <name>Д9</name>
        <description>Квадрат Д9</description>
        <styleUrl>#poly-000000-1000-0</styleUrl>
        <Polygon>
          <outerBoundaryIs>
            <LinearRing>
              <tessellate>1</tessellate>
              <coordinates>
                39.6667,56.4167,0
                39.8333,56.4167,0
                39.8333,56.5,0
                39.6667,56.5,0
                39.6667,56.4167,0
              </coordinates>
            </LinearRing>
          </outerBoundaryIs>
        </Polygon>
      </Placemark>
      <Placemark>
        <name>Д10</name>
        <description>Квадрат Д10</description>
        <styleUrl>#poly-000000-1000-0</styleUrl>
        <Polygon>
          <outerBoundaryIs>
            <LinearRing>
              <tessellate>1</tessellate>
              <coordinates>
                39.8333,56.4167,0
                40,56.4167,0
                40,56.5,0
                39.8333,56.5,0
                39.8333,56.4167,0
              </coordinates>
            </LinearRing>
          </outerBoundaryIs>
        </Polygon>
      </Placemark>
      <Placemark>
        <name>Д11</name>
        <description>Квадрат Д11</description>
        <styleUrl>#poly-000000-1000-0</styleUrl>
        <Polygon>
          <outerBoundaryIs>
            <LinearRing>
              <tessellate>1</tessellate>
              <coordinates>
                40,56.4167,0
                40.1667,56.4167,0
                40.1667,56.5,0
                40,56.5,0
                40,56.4167,0
              </coordinates>
            </LinearRing>
          </outerBoundaryIs>
        </Polygon>
      </Placemark>
      <Placemark>
        <name>Д12</name>
        <description>Квадрат Д12</description>
        <styleUrl>#poly-000000-1000-0</styleUrl>
        <Polygon>
          <outerBoundaryIs>
            <LinearRing>
              <tessellate>1</tessellate>
              <coordinates>
                40.1667,56.4167,0
                40.3333,56.4167,0
                40.3333,56.5,0
                40.1667,56.5,0
                40.1667,56.4167,0
              </coordinates>
            </LinearRing>
          </outerBoundaryIs>
        </Polygon>
      </Placemark>
      <Placemark>
        <name>Д13</name>
        <description>Квадрат Д13</description>
        <styleUrl>#poly-000000-1000-0</styleUrl>
        <Polygon>
          <outerBoundaryIs>
            <LinearRing>
              <tessellate>1</tessellate>
              <coordinates>
                40.3333,56.4167,0
                40.5,56.4167,0
                40.5,56.5,0
                40.3333,56.5,0
                40.3333,56.4167,0
              </coordinates>
            </LinearRing>
          </outerBoundaryIs>
        </Polygon>
      </Placemark>
      <Placemark>
        <name>Д14</name>
        <description>Квадрат Д14</description>
        <styleUrl>#poly-000000-1000-0</styleUrl>
        <Polygon>
          <outerBoundaryIs>
            <LinearRing>
              <tessellate>1</tessellate>
              <coordinates>
                40.5,56.4167,0
                40.6667,56.4167,0
                40.6667,56.5,0
                40.5,56.5,0
                40.5,56.4167,0
              </coordinates>
            </LinearRing>
          </outerBoundaryIs>
        </Polygon>
      </Placemark>
      <Placemark>
        <name>Д15</name>
        <description>Квадрат Д15</description>
        <styleUrl>#poly-000000-1000-0</styleUrl>
        <Polygon>
          <outerBoundaryIs>
            <LinearRing>
              <tessellate>1</tessellate>
              <coordinates>
                40.6667,56.4167,0
                40.8333,56.4167,0
                40.8333,56.5,0
                40.6667,56.5,0
                40.6667,56.4167,0
              </coordinates>
            </LinearRing>
          </outerBoundaryIs>
        </Polygon>
      </Placemark>
      <Placemark>
        <name>Д16</name>
        <description>Квадрат Д16</description>
        <styleUrl>#poly-000000-1000-0</styleUrl>
        <Polygon>
          <outerBoundaryIs>
            <LinearRing>
              <tessellate>1</tessellate>
              <coordinates>
                40.8333,56.4167,0
                41,56.4167,0
                41,56.5,0
                40.8333,56.5,0
                40.8333,56.4167,0
              </coordinates>
            </LinearRing>
          </outerBoundaryIs>
        </Polygon>
      </Placemark>
      <Placemark>
        <name>Д17</name>
        <description>Квадрат Д17</description>
        <styleUrl>#poly-000000-1000-0</styleUrl>
        <Polygon>
          <outerBoundaryIs>
            <LinearRing>
              <tessellate>1</tessellate>
              <coordinates>
                41,56.4167,0
                41.1667,56.4167,0
                41.1667,56.5,0
                41,56.5,0
                41,56.4167,0
              </coordinates>
            </LinearRing>
          </outerBoundaryIs>
        </Polygon>
      </Placemark>
      <Placemark>
        <name>Д18</name>
        <description>Квадрат Д18</description>
        <styleUrl>#poly-000000-1000-0</styleUrl>
        <Polygon>
          <outerBoundaryIs>
            <LinearRing>
              <tessellate>1</tessellate>
              <coordinates>
                41.1667,56.4167,0
                41.3333,56.4167,0
                41.3333,56.5,0
                41.1667,56.5,0
                41.1667,56.4167,0
              </coordinates>
            </LinearRing>
          </outerBoundaryIs>
        </Polygon>
      </Placemark>
      <Placemark>
        <name>Д19</name>
        <description>Квадрат Д19</description>
        <styleUrl>#poly-000000-1000-0</styleUrl>
        <Polygon>
          <outerBoundaryIs>
            <LinearRing>
              <tessellate>1</tessellate>
              <coordinates>
                41.3333,56.4167,0
                41.5,56.4167,0
                41.5,56.5,0
                41.3333,56.5,0
                41.3333,56.4167,0
              </coordinates>
            </LinearRing>
          </outerBoundaryIs>
        </Polygon>
      </Placemark>
      <Placemark>
        <name>Д20</name>
        <description>Квадрат Д20</description>
        <styleUrl>#poly-000000-1000-0</styleUrl>
        <Polygon>
          <outerBoundaryIs>
            <LinearRing>
              <tessellate>1</tessellate>
              <coordinates>
                41.5,56.4167,0
                41.6667,56.4167,0
                41.6667,56.5,0
                41.5,56.5,0
                41.5,56.4167,0
              </coordinates>
            </LinearRing>
          </outerBoundaryIs>
        </Polygon>
      </Placemark>
      <Placemark>
        <name>Д21</name>
        <description>Квадрат Д21</description>
        <styleUrl>#poly-000000-1000-0</styleUrl>
        <Polygon>
          <outerBoundaryIs>
            <LinearRing>
              <tessellate>1</tessellate>
              <coordinates>
                41.6667,56.4167,0
                41.8333,56.4167,0
                41.8333,56.5,0
                41.6667,56.5,0
                41.6667,56.4167,0
              </coordinates>
            </LinearRing>
          </outerBoundaryIs>
        </Polygon>
      </Placemark>
      <Placemark>
        <name>Д22</name>
        <description>Квадрат Д22</description>
        <styleUrl>#poly-000000-1000-0</styleUrl>
        <Polygon>
          <outerBoundaryIs>
            <LinearRing>
              <tessellate>1</tessellate>
              <coordinates>
                41.8333,56.4167,0
                42,56.4167,0
                42,56.5,0
                41.8333,56.5,0
                41.8333,56.4167,0
              </coordinates>
            </LinearRing>
          </outerBoundaryIs>
        </Polygon>
      </Placemark>
      <Placemark>
        <name>Д23</name>
        <description>Квадрат Д23</description>
        <styleUrl>#poly-000000-1000-0</styleUrl>
        <Polygon>
          <outerBoundaryIs>
            <LinearRing>
              <tessellate>1</tessellate>
              <coordinates>
                42.1667,56.4167,0
                42.3333,56.4167,0
                42.3333,56.5,0
                42.1667,56.5,0
                42.1667,56.4167,0
              </coordinates>
            </LinearRing>
          </outerBoundaryIs>
        </Polygon>
      </Placemark>
      <Placemark>
        <name>Д24</name>
        <description>Квадрат Д24</description>
        <styleUrl>#poly-000000-1000-0</styleUrl>
        <Polygon>
          <outerBoundaryIs>
            <LinearRing>
              <tessellate>1</tessellate>
              <coordinates>
                42.3333,56.4167,0
                42.5,56.4167,0
                42.5,56.5,0
                42.3333,56.5,0
                42.3333,56.4167,0
              </coordinates>
            </LinearRing>
          </outerBoundaryIs>
        </Polygon>
      </Placemark>
      <Placemark>
        <name>Е1</name>
        <description>Квадрат Е1</description>
        <styleUrl>#poly-000000-1000-0</styleUrl>
        <Polygon>
          <outerBoundaryIs>
            <LinearRing>
              <tessellate>1</tessellate>
              <coordinates>
                38.3333,56.3333,0
                38.5,56.3333,0
                38.5,56.4167,0
                38.3333,56.4167,0
                38.3333,56.3333,0
              </coordinates>
            </LinearRing>
          </outerBoundaryIs>
        </Polygon>
      </Placemark>
      <Placemark>
        <name>Е2</name>
        <description>Квадрат Е2</description>
        <styleUrl>#poly-000000-1000-0</styleUrl>
        <Polygon>
          <outerBoundaryIs>
            <LinearRing>
              <tessellate>1</tessellate>
              <coordinates>
                38.5,56.3333,0
                38.6667,56.3333,0
                38.6667,56.4167,0
                38.5,56.4167,0
                38.5,56.3333,0
              </coordinates>
            </LinearRing>
          </outerBoundaryIs>
        </Polygon>
      </Placemark>
      <Placemark>
        <name>Е3</name>
        <description>Квадрат Е3</description>
        <styleUrl>#poly-000000-1000-0</styleUrl>
        <Polygon>
          <outerBoundaryIs>
            <LinearRing>
              <tessellate>1</tessellate>
              <coordinates>
                38.6667,56.3333,0
                38.8333,56.3333,0
                38.8333,56.4167,0
                38.6667,56.4167,0
                38.6667,56.3333,0
              </coordinates>
            </LinearRing>
          </outerBoundaryIs>
        </Polygon>
      </Placemark>
      <Placemark>
        <name>Е4</name>
        <description>Квадрат Е4</description>
        <styleUrl>#poly-000000-1000-0</styleUrl>
        <Polygon>
          <outerBoundaryIs>
            <LinearRing>
              <tessellate>1</tessellate>
              <coordinates>
                38.8333,56.3333,0
                39,56.3333,0
                39,56.4167,0
                38.8333,56.4167,0
                38.8333,56.3333,0
              </coordinates>
            </LinearRing>
          </outerBoundaryIs>
        </Polygon>
      </Placemark>
      <Placemark>
        <name>Е5</name>
        <description>Квадрат Е5</description>
        <styleUrl>#poly-000000-1000-0</styleUrl>
        <Polygon>
          <outerBoundaryIs>
            <LinearRing>
              <tessellate>1</tessellate>
              <coordinates>
                39,56.3333,0
                39.1667,56.3333,0
                39.1667,56.4167,0
                39,56.4167,0
                39,56.3333,0
              </coordinates>
            </LinearRing>
          </outerBoundaryIs>
        </Polygon>
      </Placemark>
      <Placemark>
        <name>Е6</name>
        <description>Квадрат Е6</description>
        <styleUrl>#poly-000000-1000-0</styleUrl>
        <Polygon>
          <outerBoundaryIs>
            <LinearRing>
              <tessellate>1</tessellate>
              <coordinates>
                39.1667,56.3333,0
                39.3333,56.3333,0
                39.3333,56.4167,0
                39.1667,56.4167,0
                39.1667,56.3333,0
              </coordinates>
            </LinearRing>
          </outerBoundaryIs>
        </Polygon>
      </Placemark>
      <Placemark>
        <name>Е7</name>
        <description>Квадрат Е7</description>
        <styleUrl>#poly-000000-1000-0</styleUrl>
        <Polygon>
          <outerBoundaryIs>
            <LinearRing>
              <tessellate>1</tessellate>
              <coordinates>
                39.3333,56.3333,0
                39.5,56.3333,0
                39.5,56.4167,0
                39.3333,56.4167,0
                39.3333,56.3333,0
              </coordinates>
            </LinearRing>
          </outerBoundaryIs>
        </Polygon>
      </Placemark>
      <Placemark>
        <name>Е8</name>
        <description>Квадрат Е8</description>
        <styleUrl>#poly-000000-1000-0</styleUrl>
        <Polygon>
          <outerBoundaryIs>
            <LinearRing>
              <tessellate>1</tessellate>
              <coordinates>
                39.5,56.3333,0
                39.6667,56.3333,0
                39.6667,56.4167,0
                39.5,56.4167,0
                39.5,56.3333,0
              </coordinates>
            </LinearRing>
          </outerBoundaryIs>
        </Polygon>
      </Placemark>
      <Placemark>
        <name>Е9</name>
        <description>Квадрат Е9</description>
        <styleUrl>#poly-000000-1000-0</styleUrl>
        <Polygon>
          <outerBoundaryIs>
            <LinearRing>
              <tessellate>1</tessellate>
              <coordinates>
                39.6667,56.3333,0
                39.8333,56.3333,0
                39.8333,56.4167,0
                39.6667,56.4167,0
                39.6667,56.3333,0
              </coordinates>
            </LinearRing>
          </outerBoundaryIs>
        </Polygon>
      </Placemark>
      <Placemark>
        <name>Е10</name>
        <description>Квадрат Е10</description>
        <styleUrl>#poly-000000-1000-0</styleUrl>
        <Polygon>
          <outerBoundaryIs>
            <LinearRing>
              <tessellate>1</tessellate>
              <coordinates>
                39.8333,56.3333,0
                40,56.3333,0
                40,56.4167,0
                39.8333,56.4167,0
                39.8333,56.3333,0
              </coordinates>
            </LinearRing>
          </outerBoundaryIs>
        </Polygon>
      </Placemark>
      <Placemark>
        <name>Е11</name>
        <description>Квадрат Е11</description>
        <styleUrl>#poly-000000-1000-0</styleUrl>
        <Polygon>
          <outerBoundaryIs>
            <LinearRing>
              <tessellate>1</tessellate>
              <coordinates>
                40,56.3333,0
                40.1667,56.3333,0
                40.1667,56.4167,0
                40,56.4167,0
                40,56.3333,0
              </coordinates>
            </LinearRing>
          </outerBoundaryIs>
        </Polygon>
      </Placemark>
      <Placemark>
        <name>Е12</name>
        <description>Квадрат Е12</description>
        <styleUrl>#poly-000000-1000-0</styleUrl>
        <Polygon>
          <outerBoundaryIs>
            <LinearRing>
              <tessellate>1</tessellate>
              <coordinates>
                40.1667,56.3333,0
                40.3333,56.3333,0
                40.3333,56.4167,0
                40.1667,56.4167,0
                40.1667,56.3333,0
              </coordinates>
            </LinearRing>
          </outerBoundaryIs>
        </Polygon>
      </Placemark>
      <Placemark>
        <name>Е13</name>
        <description>Квадрат Е13</description>
        <styleUrl>#poly-000000-1000-0</styleUrl>
        <Polygon>
          <outerBoundaryIs>
            <LinearRing>
              <tessellate>1</tessellate>
              <coordinates>
                40.3333,56.3333,0
                40.5,56.3333,0
                40.5,56.4167,0
                40.3333,56.4167,0
                40.3333,56.3333,0
              </coordinates>
            </LinearRing>
          </outerBoundaryIs>
        </Polygon>
      </Placemark>
      <Placemark>
        <name>Е14</name>
        <description>Квадрат Е14</description>
        <styleUrl>#poly-000000-1000-0</styleUrl>
        <Polygon>
          <outerBoundaryIs>
            <LinearRing>
              <tessellate>1</tessellate>
              <coordinates>
                40.5,56.3333,0
                40.6667,56.3333,0
                40.6667,56.4167,0
                40.5,56.4167,0
                40.5,56.3333,0
              </coordinates>
            </LinearRing>
          </outerBoundaryIs>
        </Polygon>
      </Placemark>
      <Placemark>
        <name>Е15</name>
        <description>Квадрат Е15</description>
        <styleUrl>#poly-000000-1000-0</styleUrl>
        <Polygon>
          <outerBoundaryIs>
            <LinearRing>
              <tessellate>1</tessellate>
              <coordinates>
                40.6667,56.3333,0
                40.8333,56.3333,0
                40.8333,56.4167,0
                40.6667,56.4167,0
                40.6667,56.3333,0
              </coordinates>
            </LinearRing>
          </outerBoundaryIs>
        </Polygon>
      </Placemark>
      <Placemark>
        <name>Е16</name>
        <description>Квадрат Е16</description>
        <styleUrl>#poly-000000-1000-0</styleUrl>
        <Polygon>
          <outerBoundaryIs>
            <LinearRing>
              <tessellate>1</tessellate>
              <coordinates>
                40.8333,56.3333,0
                41,56.3333,0
                41,56.4167,0
                40.8333,56.4167,0
                40.8333,56.3333,0
              </coordinates>
            </LinearRing>
          </outerBoundaryIs>
        </Polygon>
      </Placemark>
      <Placemark>
        <name>Е17</name>
        <description>Квадрат Е17</description>
        <styleUrl>#poly-000000-1000-0</styleUrl>
        <Polygon>
          <outerBoundaryIs>
            <LinearRing>
              <tessellate>1</tessellate>
              <coordinates>
                41,56.3333,0
                41.1667,56.3333,0
                41.1667,56.4167,0
                41,56.4167,0
                41,56.3333,0
              </coordinates>
            </LinearRing>
          </outerBoundaryIs>
        </Polygon>
      </Placemark>
      <Placemark>
        <name>Е18</name>
        <description>Квадрат Е18</description>
        <styleUrl>#poly-000000-1000-0</styleUrl>
        <Polygon>
          <outerBoundaryIs>
            <LinearRing>
              <tessellate>1</tessellate>
              <coordinates>
                41.1667,56.3333,0
                41.3333,56.3333,0
                41.3333,56.4167,0
                41.1667,56.4167,0
                41.1667,56.3333,0
              </coordinates>
            </LinearRing>
          </outerBoundaryIs>
        </Polygon>
      </Placemark>
      <Placemark>
        <name>Е19</name>
        <description>Квадрат Е19</description>
        <styleUrl>#poly-000000-1000-0</styleUrl>
        <Polygon>
          <outerBoundaryIs>
            <LinearRing>
              <tessellate>1</tessellate>
              <coordinates>
                41.3333,56.3333,0
                41.5,56.3333,0
                41.5,56.4167,0
                41.3333,56.4167,0
                41.3333,56.3333,0
              </coordinates>
            </LinearRing>
          </outerBoundaryIs>
        </Polygon>
      </Placemark>
      <Placemark>
        <name>Е20</name>
        <description>Квадрат Е20</description>
        <styleUrl>#poly-000000-1000-0</styleUrl>
        <Polygon>
          <outerBoundaryIs>
            <LinearRing>
              <tessellate>1</tessellate>
              <coordinates>
                41.5,56.3333,0
                41.6667,56.3333,0
                41.6667,56.4167,0
                41.5,56.4167,0
                41.5,56.3333,0
              </coordinates>
            </LinearRing>
          </outerBoundaryIs>
        </Polygon>
      </Placemark>
      <Placemark>
        <name>Е21</name>
        <description>Квадрат Е21</description>
        <styleUrl>#poly-000000-1000-0</styleUrl>
        <Polygon>
          <outerBoundaryIs>
            <LinearRing>
              <tessellate>1</tessellate>
              <coordinates>
                41.6667,56.3333,0
                41.8333,56.3333,0
                41.8333,56.4167,0
                41.6667,56.4167,0
                41.6667,56.3333,0
              </coordinates>
            </LinearRing>
          </outerBoundaryIs>
        </Polygon>
      </Placemark>
      <Placemark>
        <name>Е22</name>
        <description>Квадрат Е22</description>
        <styleUrl>#poly-000000-1000-0</styleUrl>
        <Polygon>
          <outerBoundaryIs>
            <LinearRing>
              <tessellate>1</tessellate>
              <coordinates>
                41.8333,56.3333,0
                42,56.3333,0
                42,56.4167,0
                41.8333,56.4167,0
                41.8333,56.3333,0
              </coordinates>
            </LinearRing>
          </outerBoundaryIs>
        </Polygon>
      </Placemark>
      <Placemark>
        <name>Е23</name>
        <description>Квадрат Е23</description>
        <styleUrl>#poly-000000-1000-0</styleUrl>
        <Polygon>
          <outerBoundaryIs>
            <LinearRing>
              <tessellate>1</tessellate>
              <coordinates>
                42,56.3333,0
                42.1667,56.3333,0
                42.1667,56.4167,0
                42,56.4167,0
                42,56.3333,0
              </coordinates>
            </LinearRing>
          </outerBoundaryIs>
        </Polygon>
      </Placemark>
      <Placemark>
        <name>Е24</name>
        <description>Квадрат Е24</description>
        <styleUrl>#poly-000000-1000-0</styleUrl>
        <Polygon>
          <outerBoundaryIs>
            <LinearRing>
              <tessellate>1</tessellate>
              <coordinates>
                42.1667,56.3333,0
                42.3333,56.3333,0
                42.3333,56.4167,0
                42.1667,56.4167,0
                42.1667,56.3333,0
              </coordinates>
            </LinearRing>
          </outerBoundaryIs>
        </Polygon>
      </Placemark>
      <Placemark>
        <name>Е25</name>
        <description>Квадрат Е25</description>
        <styleUrl>#poly-000000-1000-0</styleUrl>
        <Polygon>
          <outerBoundaryIs>
            <LinearRing>
              <tessellate>1</tessellate>
              <coordinates>
                42.3333,56.3333,0
                42.5,56.3333,0
                42.5,56.4167,0
                42.3333,56.4167,0
                42.3333,56.3333,0
              </coordinates>
            </LinearRing>
          </outerBoundaryIs>
        </Polygon>
      </Placemark>
      <Placemark>
        <name>Е26</name>
        <description>Квадрат Е26</description>
        <styleUrl>#poly-000000-1000-0</styleUrl>
        <Polygon>
          <outerBoundaryIs>
            <LinearRing>
              <tessellate>1</tessellate>
              <coordinates>
                42.5,56.3333,0
                42.6667,56.3333,0
                42.6667,56.4167,0
                42.5,56.4167,0
                42.5,56.3333,0
              </coordinates>
            </LinearRing>
          </outerBoundaryIs>
        </Polygon>
      </Placemark>
      <Placemark>
        <name>Е27</name>
        <description>Квадрат Е27</description>
        <styleUrl>#poly-000000-1000-0</styleUrl>
        <Polygon>
          <outerBoundaryIs>
            <LinearRing>
              <tessellate>1</tessellate>
              <coordinates>
                42.6667,56.3333,0
                42.8333,56.3333,0
                42.8333,56.4167,0
                42.6667,56.4167,0
                42.6667,56.3333,0
              </coordinates>
            </LinearRing>
          </outerBoundaryIs>
        </Polygon>
      </Placemark>
      <Placemark>
        <name>Ж1</name>
        <description>Квадрат Ж1</description>
        <styleUrl>#poly-000000-1000-0</styleUrl>
        <Polygon>
          <outerBoundaryIs>
            <LinearRing>
              <tessellate>1</tessellate>
              <coordinates>
                38.3333,56.25,0
                38.5,56.25,0
                38.5,56.3333,0
                38.3333,56.3333,0
                38.3333,56.25,0
              </coordinates>
            </LinearRing>
          </outerBoundaryIs>
        </Polygon>
      </Placemark>
      <Placemark>
        <name>Ж2</name>
        <description>Квадрат Ж2</description>
        <styleUrl>#poly-000000-1000-0</styleUrl>
        <Polygon>
          <outerBoundaryIs>
            <LinearRing>
              <tessellate>1</tessellate>
              <coordinates>
                38.5,56.25,0
                38.6667,56.25,0
                38.6667,56.3333,0
                38.5,56.3333,0
                38.5,56.25,0
              </coordinates>
            </LinearRing>
          </outerBoundaryIs>
        </Polygon>
      </Placemark>
      <Placemark>
        <name>Ж3</name>
        <description>Квадрат Ж3</description>
        <styleUrl>#poly-000000-1000-0</styleUrl>
        <Polygon>
          <outerBoundaryIs>
            <LinearRing>
              <tessellate>1</tessellate>
              <coordinates>
                38.6667,56.25,0
                38.8333,56.25,0
                38.8333,56.3333,0
                38.6667,56.3333,0
                38.6667,56.25,0
              </coordinates>
            </LinearRing>
          </outerBoundaryIs>
        </Polygon>
      </Placemark>
      <Placemark>
        <name>Ж4</name>
        <description>Квадрат Ж4</description>
        <styleUrl>#poly-000000-1000-0</styleUrl>
        <Polygon>
          <outerBoundaryIs>
            <LinearRing>
              <tessellate>1</tessellate>
              <coordinates>
                38.8333,56.25,0
                39,56.25,0
                39,56.3333,0
                38.8333,56.3333,0
                38.8333,56.25,0
              </coordinates>
            </LinearRing>
          </outerBoundaryIs>
        </Polygon>
      </Placemark>
      <Placemark>
        <name>Ж5</name>
        <description>Квадрат Ж5</description>
        <styleUrl>#poly-000000-1000-0</styleUrl>
        <Polygon>
          <outerBoundaryIs>
            <LinearRing>
              <tessellate>1</tessellate>
              <coordinates>
                39,56.25,0
                39.1667,56.25,0
                39.1667,56.3333,0
                39,56.3333,0
                39,56.25,0
              </coordinates>
            </LinearRing>
          </outerBoundaryIs>
        </Polygon>
      </Placemark>
      <Placemark>
        <name>Ж6</name>
        <description>Квадрат Ж6</description>
        <styleUrl>#poly-000000-1000-0</styleUrl>
        <Polygon>
          <outerBoundaryIs>
            <LinearRing>
              <tessellate>1</tessellate>
              <coordinates>
                39.1667,56.25,0
                39.3333,56.25,0
                39.3333,56.3333,0
                39.1667,56.3333,0
                39.1667,56.25,0
              </coordinates>
            </LinearRing>
          </outerBoundaryIs>
        </Polygon>
      </Placemark>
      <Placemark>
        <name>Ж7</name>
        <description>Квадрат Ж7</description>
        <styleUrl>#poly-000000-1000-0</styleUrl>
        <Polygon>
          <outerBoundaryIs>
            <LinearRing>
              <tessellate>1</tessellate>
              <coordinates>
                39.3333,56.25,0
                39.5,56.25,0
                39.5,56.3333,0
                39.3333,56.3333,0
                39.3333,56.25,0
              </coordinates>
            </LinearRing>
          </outerBoundaryIs>
        </Polygon>
      </Placemark>
      <Placemark>
        <name>Ж8</name>
        <description>Квадрат Ж8</description>
        <styleUrl>#poly-000000-1000-0</styleUrl>
        <Polygon>
          <outerBoundaryIs>
            <LinearRing>
              <tessellate>1</tessellate>
              <coordinates>
                39.5,56.25,0
                39.6667,56.25,0
                39.6667,56.3333,0
                39.5,56.3333,0
                39.5,56.25,0
              </coordinates>
            </LinearRing>
          </outerBoundaryIs>
        </Polygon>
      </Placemark>
      <Placemark>
        <name>Ж9</name>
        <description>Квадрат Ж9</description>
        <styleUrl>#poly-000000-1000-0</styleUrl>
        <Polygon>
          <outerBoundaryIs>
            <LinearRing>
              <tessellate>1</tessellate>
              <coordinates>
                39.6667,56.25,0
                39.8333,56.25,0
                39.8333,56.3333,0
                39.6667,56.3333,0
                39.6667,56.25,0
              </coordinates>
            </LinearRing>
          </outerBoundaryIs>
        </Polygon>
      </Placemark>
      <Placemark>
        <name>Ж10</name>
        <description>Квадрат Ж10</description>
        <styleUrl>#poly-000000-1000-0</styleUrl>
        <Polygon>
          <outerBoundaryIs>
            <LinearRing>
              <tessellate>1</tessellate>
              <coordinates>
                39.8333,56.25,0
                40,56.25,0
                40,56.3333,0
                39.8333,56.3333,0
                39.8333,56.25,0
              </coordinates>
            </LinearRing>
          </outerBoundaryIs>
        </Polygon>
      </Placemark>
      <Placemark>
        <name>Ж11</name>
        <description>Квадрат Ж11</description>
        <styleUrl>#poly-000000-1000-0</styleUrl>
        <Polygon>
          <outerBoundaryIs>
            <LinearRing>
              <tessellate>1</tessellate>
              <coordinates>
                40,56.25,0
                40.1667,56.25,0
                40.1667,56.3333,0
                40,56.3333,0
                40,56.25,0
              </coordinates>
            </LinearRing>
          </outerBoundaryIs>
        </Polygon>
      </Placemark>
      <Placemark>
        <name>Ж12</name>
        <description>Квадрат Ж12</description>
        <styleUrl>#poly-000000-1000-0</styleUrl>
        <Polygon>
          <outerBoundaryIs>
            <LinearRing>
              <tessellate>1</tessellate>
              <coordinates>
                40.1667,56.25,0
                40.3333,56.25,0
                40.3333,56.3333,0
                40.1667,56.3333,0
                40.1667,56.25,0
              </coordinates>
            </LinearRing>
          </outerBoundaryIs>
        </Polygon>
      </Placemark>
      <Placemark>
        <name>Ж13</name>
        <description>Квадрат Ж13</description>
        <styleUrl>#poly-000000-1000-0</styleUrl>
        <Polygon>
          <outerBoundaryIs>
            <LinearRing>
              <tessellate>1</tessellate>
              <coordinates>
                40.3333,56.25,0
                40.5,56.25,0
                40.5,56.3333,0
                40.3333,56.3333,0
                40.3333,56.25,0
              </coordinates>
            </LinearRing>
          </outerBoundaryIs>
        </Polygon>
      </Placemark>
      <Placemark>
        <name>Ж14</name>
        <description>Квадрат Ж14</description>
        <styleUrl>#poly-000000-1000-0</styleUrl>
        <Polygon>
          <outerBoundaryIs>
            <LinearRing>
              <tessellate>1</tessellate>
              <coordinates>
                40.5,56.25,0
                40.6667,56.25,0
                40.6667,56.3333,0
                40.5,56.3333,0
                40.5,56.25,0
              </coordinates>
            </LinearRing>
          </outerBoundaryIs>
        </Polygon>
      </Placemark>
      <Placemark>
        <name>Ж15</name>
        <description>Квадрат Ж15</description>
        <styleUrl>#poly-000000-1000-0</styleUrl>
        <Polygon>
          <outerBoundaryIs>
            <LinearRing>
              <tessellate>1</tessellate>
              <coordinates>
                40.6667,56.25,0
                40.8333,56.25,0
                40.8333,56.3333,0
                40.6667,56.3333,0
                40.6667,56.25,0
              </coordinates>
            </LinearRing>
          </outerBoundaryIs>
        </Polygon>
      </Placemark>
      <Placemark>
        <name>Ж16</name>
        <description>Квадрат Ж16</description>
        <styleUrl>#poly-000000-1000-0</styleUrl>
        <Polygon>
          <outerBoundaryIs>
            <LinearRing>
              <tessellate>1</tessellate>
              <coordinates>
                40.8333,56.25,0
                41,56.25,0
                41,56.3333,0
                40.8333,56.3333,0
                40.8333,56.25,0
              </coordinates>
            </LinearRing>
          </outerBoundaryIs>
        </Polygon>
      </Placemark>
      <Placemark>
        <name>Ж17</name>
        <description>Квадрат Ж17</description>
        <styleUrl>#poly-000000-1000-0</styleUrl>
        <Polygon>
          <outerBoundaryIs>
            <LinearRing>
              <tessellate>1</tessellate>
              <coordinates>
                41,56.25,0
                41.1667,56.25,0
                41.1667,56.3333,0
                41,56.3333,0
                41,56.25,0
              </coordinates>
            </LinearRing>
          </outerBoundaryIs>
        </Polygon>
      </Placemark>
      <Placemark>
        <name>Ж18</name>
        <description>Квадрат Ж18</description>
        <styleUrl>#poly-000000-1000-0</styleUrl>
        <Polygon>
          <outerBoundaryIs>
            <LinearRing>
              <tessellate>1</tessellate>
              <coordinates>
                41.1667,56.25,0
                41.3333,56.25,0
                41.3333,56.3333,0
                41.1667,56.3333,0
                41.1667,56.25,0
              </coordinates>
            </LinearRing>
          </outerBoundaryIs>
        </Polygon>
      </Placemark>
      <Placemark>
        <name>Ж19</name>
        <description>Квадрат Ж19</description>
        <styleUrl>#poly-000000-1000-0</styleUrl>
        <Polygon>
          <outerBoundaryIs>
            <LinearRing>
              <tessellate>1</tessellate>
              <coordinates>
                41.3333,56.25,0
                41.5,56.25,0
                41.5,56.3333,0
                41.3333,56.3333,0
                41.3333,56.25,0
              </coordinates>
            </LinearRing>
          </outerBoundaryIs>
        </Polygon>
      </Placemark>
      <Placemark>
        <name>Ж20</name>
        <description>Квадрат Ж20</description>
        <styleUrl>#poly-000000-1000-0</styleUrl>
        <Polygon>
          <outerBoundaryIs>
            <LinearRing>
              <tessellate>1</tessellate>
              <coordinates>
                41.5,56.25,0
                41.6667,56.25,0
                41.6667,56.3333,0
                41.5,56.3333,0
                41.5,56.25,0
              </coordinates>
            </LinearRing>
          </outerBoundaryIs>
        </Polygon>
      </Placemark>
      <Placemark>
        <name>Ж21</name>
        <description>Квадрат Ж21</description>
        <styleUrl>#poly-000000-1000-0</styleUrl>
        <Polygon>
          <outerBoundaryIs>
            <LinearRing>
              <tessellate>1</tessellate>
              <coordinates>
                41.6667,56.25,0
                41.8333,56.25,0
                41.8333,56.3333,0
                41.6667,56.3333,0
                41.6667,56.25,0
              </coordinates>
            </LinearRing>
          </outerBoundaryIs>
        </Polygon>
      </Placemark>
      <Placemark>
        <name>Ж22</name>
        <description>Квадрат Ж22</description>
        <styleUrl>#poly-000000-1000-0</styleUrl>
        <Polygon>
          <outerBoundaryIs>
            <LinearRing>
              <tessellate>1</tessellate>
              <coordinates>
                41.8333,56.25,0
                42,56.25,0
                42,56.3333,0
                41.8333,56.3333,0
                41.8333,56.25,0
              </coordinates>
            </LinearRing>
          </outerBoundaryIs>
        </Polygon>
      </Placemark>
      <Placemark>
        <name>Ж23</name>
        <description>Квадрат Ж23</description>
        <styleUrl>#poly-000000-1000-0</styleUrl>
        <Polygon>
          <outerBoundaryIs>
            <LinearRing>
              <tessellate>1</tessellate>
              <coordinates>
                42,56.25,0
                42.1667,56.25,0
                42.1667,56.3333,0
                42,56.3333,0
                42,56.25,0
              </coordinates>
            </LinearRing>
          </outerBoundaryIs>
        </Polygon>
      </Placemark>
      <Placemark>
        <name>Ж24</name>
        <description>Квадрат Ж24</description>
        <styleUrl>#poly-000000-1000-0</styleUrl>
        <Polygon>
          <outerBoundaryIs>
            <LinearRing>
              <tessellate>1</tessellate>
              <coordinates>
                42.1667,56.25,0
                42.3333,56.25,0
                42.3333,56.3333,0
                42.1667,56.3333,0
                42.1667,56.25,0
              </coordinates>
            </LinearRing>
          </outerBoundaryIs>
        </Polygon>
      </Placemark>
      <Placemark>
        <name>Ж25</name>
        <description>Квадрат Ж25</description>
        <styleUrl>#poly-000000-1000-0</styleUrl>
        <Polygon>
          <outerBoundaryIs>
            <LinearRing>
              <tessellate>1</tessellate>
              <coordinates>
                42.3333,56.25,0
                42.5,56.25,0
                42.5,56.3333,0
                42.3333,56.3333,0
                42.3333,56.25,0
              </coordinates>
            </LinearRing>
          </outerBoundaryIs>
        </Polygon>
      </Placemark>
      <Placemark>
        <name>Ж26</name>
        <description>Квадрат Ж26</description>
        <styleUrl>#poly-000000-1000-0</styleUrl>
        <Polygon>
          <outerBoundaryIs>
            <LinearRing>
              <tessellate>1</tessellate>
              <coordinates>
                42.5,56.25,0
                42.6667,56.25,0
                42.6667,56.3333,0
                42.5,56.3333,0
                42.5,56.25,0
              </coordinates>
            </LinearRing>
          </outerBoundaryIs>
        </Polygon>
      </Placemark>
      <Placemark>
        <name>Ж27</name>
        <description>Квадрат Ж27</description>
        <styleUrl>#poly-000000-1000-0</styleUrl>
        <Polygon>
          <outerBoundaryIs>
            <LinearRing>
              <tessellate>1</tessellate>
              <coordinates>
                42.6667,56.25,0
                42.8333,56.25,0
                42.8333,56.3333,0
                42.6667,56.3333,0
                42.6667,56.25,0
              </coordinates>
            </LinearRing>
          </outerBoundaryIs>
        </Polygon>
      </Placemark>
      <Placemark>
        <name>З1</name>
        <description>Квадрат 31</description>
        <styleUrl>#poly-000000-1000-0</styleUrl>
        <Polygon>
          <outerBoundaryIs>
            <LinearRing>
              <tessellate>1</tessellate>
              <coordinates>
                38.3333,56.1667,0
                38.5,56.1667,0
                38.5,56.25,0
                38.3333,56.25,0
                38.3333,56.1667,0
              </coordinates>
            </LinearRing>
          </outerBoundaryIs>
        </Polygon>
      </Placemark>
      <Placemark>
        <name>З2</name>
        <description>Квадрат 32</description>
        <styleUrl>#poly-000000-1000-0</styleUrl>
        <Polygon>
          <outerBoundaryIs>
            <LinearRing>
              <tessellate>1</tessellate>
              <coordinates>
                38.5,56.1667,0
                38.6667,56.1667,0
                38.6667,56.25,0
                38.5,56.25,0
                38.5,56.1667,0
              </coordinates>
            </LinearRing>
          </outerBoundaryIs>
        </Polygon>
      </Placemark>
      <Placemark>
        <name>З3</name>
        <description>Квадрат 33</description>
        <styleUrl>#poly-000000-1000-0</styleUrl>
        <Polygon>
          <outerBoundaryIs>
            <LinearRing>
              <tessellate>1</tessellate>
              <coordinates>
                38.6667,56.1667,0
                38.8333,56.1667,0
                38.8333,56.25,0
                38.6667,56.25,0
                38.6667,56.1667,0
              </coordinates>
            </LinearRing>
          </outerBoundaryIs>
        </Polygon>
      </Placemark>
      <Placemark>
        <name>З4</name>
        <description>Квадрат 34</description>
        <styleUrl>#poly-000000-1000-0</styleUrl>
        <Polygon>
          <outerBoundaryIs>
            <LinearRing>
              <tessellate>1</tessellate>
              <coordinates>
                38.8333,56.1667,0
                39,56.1667,0
                39,56.25,0
                38.8333,56.25,0
                38.8333,56.1667,0
              </coordinates>
            </LinearRing>
          </outerBoundaryIs>
        </Polygon>
      </Placemark>
      <Placemark>
        <name>З5</name>
        <description>Квадрат 35</description>
        <styleUrl>#poly-000000-1000-0</styleUrl>
        <Polygon>
          <outerBoundaryIs>
            <LinearRing>
              <tessellate>1</tessellate>
              <coordinates>
                39,56.1667,0
                39.1667,56.1667,0
                39.1667,56.25,0
                39,56.25,0
                39,56.1667,0
              </coordinates>
            </LinearRing>
          </outerBoundaryIs>
        </Polygon>
      </Placemark>
      <Placemark>
        <name>З6</name>
        <description>Квадрат 36</description>
        <styleUrl>#poly-000000-1000-0</styleUrl>
        <Polygon>
          <outerBoundaryIs>
            <LinearRing>
              <tessellate>1</tessellate>
              <coordinates>
                39.1667,56.1667,0
                39.3333,56.1667,0
                39.3333,56.25,0
                39.1667,56.25,0
                39.1667,56.1667,0
              </coordinates>
            </LinearRing>
          </outerBoundaryIs>
        </Polygon>
      </Placemark>
      <Placemark>
        <name>З7</name>
        <description>Квадрат 37</description>
        <styleUrl>#poly-000000-1000-0</styleUrl>
        <Polygon>
          <outerBoundaryIs>
            <LinearRing>
              <tessellate>1</tessellate>
              <coordinates>
                39.3333,56.1667,0
                39.5,56.1667,0
                39.5,56.25,0
                39.3333,56.25,0
                39.3333,56.1667,0
              </coordinates>
            </LinearRing>
          </outerBoundaryIs>
        </Polygon>
      </Placemark>
      <Placemark>
        <name>З8</name>
        <description>Квадрат 38</description>
        <styleUrl>#poly-000000-1000-0</styleUrl>
        <Polygon>
          <outerBoundaryIs>
            <LinearRing>
              <tessellate>1</tessellate>
              <coordinates>
                39.5,56.1667,0
                39.6667,56.1667,0
                39.6667,56.25,0
                39.5,56.25,0
                39.5,56.1667,0
              </coordinates>
            </LinearRing>
          </outerBoundaryIs>
        </Polygon>
      </Placemark>
      <Placemark>
        <name>З9</name>
        <description>Квадрат 39</description>
        <styleUrl>#poly-000000-1000-0</styleUrl>
        <Polygon>
          <outerBoundaryIs>
            <LinearRing>
              <tessellate>1</tessellate>
              <coordinates>
                39.6667,56.1667,0
                39.8333,56.1667,0
                39.8333,56.25,0
                39.6667,56.25,0
                39.6667,56.1667,0
              </coordinates>
            </LinearRing>
          </outerBoundaryIs>
        </Polygon>
      </Placemark>
      <Placemark>
        <name>З10</name>
        <description>Квадрат 310</description>
        <styleUrl>#poly-000000-1000-0</styleUrl>
        <Polygon>
          <outerBoundaryIs>
            <LinearRing>
              <tessellate>1</tessellate>
              <coordinates>
                39.8333,56.1667,0
                40,56.1667,0
                40,56.25,0
                39.8333,56.25,0
                39.8333,56.1667,0
              </coordinates>
            </LinearRing>
          </outerBoundaryIs>
        </Polygon>
      </Placemark>
      <Placemark>
        <name>З11</name>
        <description>Квадрат 311</description>
        <styleUrl>#poly-000000-1000-0</styleUrl>
        <Polygon>
          <outerBoundaryIs>
            <LinearRing>
              <tessellate>1</tessellate>
              <coordinates>
                40,56.1667,0
                40.1667,56.1667,0
                40.1667,56.25,0
                40,56.25,0
                40,56.1667,0
              </coordinates>
            </LinearRing>
          </outerBoundaryIs>
        </Polygon>
      </Placemark>
      <Placemark>
        <name>З12</name>
        <description>Квадрат 312</description>
        <styleUrl>#poly-000000-1000-0</styleUrl>
        <Polygon>
          <outerBoundaryIs>
            <LinearRing>
              <tessellate>1</tessellate>
              <coordinates>
                40.1667,56.1667,0
                40.3333,56.1667,0
                40.3333,56.25,0
                40.1667,56.25,0
                40.1667,56.1667,0
              </coordinates>
            </LinearRing>
          </outerBoundaryIs>
        </Polygon>
      </Placemark>
      <Placemark>
        <name>З13</name>
        <description>Квадрат 313</description>
        <styleUrl>#poly-000000-1000-0</styleUrl>
        <Polygon>
          <outerBoundaryIs>
            <LinearRing>
              <tessellate>1</tessellate>
              <coordinates>
                40.3333,56.1667,0
                40.5,56.1667,0
                40.5,56.25,0
                40.3333,56.25,0
                40.3333,56.1667,0
              </coordinates>
            </LinearRing>
          </outerBoundaryIs>
        </Polygon>
      </Placemark>
      <Placemark>
        <name>З14</name>
        <description>Квадрат 314</description>
        <styleUrl>#poly-000000-1000-0</styleUrl>
        <Polygon>
          <outerBoundaryIs>
            <LinearRing>
              <tessellate>1</tessellate>
              <coordinates>
                40.5,56.1667,0
                40.6667,56.1667,0
                40.6667,56.25,0
                40.5,56.25,0
                40.5,56.1667,0
              </coordinates>
            </LinearRing>
          </outerBoundaryIs>
        </Polygon>
      </Placemark>
      <Placemark>
        <name>З15</name>
        <description>Квадрат 315</description>
        <styleUrl>#poly-000000-1000-0</styleUrl>
        <Polygon>
          <outerBoundaryIs>
            <LinearRing>
              <tessellate>1</tessellate>
              <coordinates>
                40.6667,56.1667,0
                40.8333,56.1667,0
                40.8333,56.25,0
                40.6667,56.25,0
                40.6667,56.1667,0
              </coordinates>
            </LinearRing>
          </outerBoundaryIs>
        </Polygon>
      </Placemark>
      <Placemark>
        <name>З16</name>
        <description>Квадрат 316</description>
        <styleUrl>#poly-000000-1000-0</styleUrl>
        <Polygon>
          <outerBoundaryIs>
            <LinearRing>
              <tessellate>1</tessellate>
              <coordinates>
                40.8333,56.1667,0
                41,56.1667,0
                41,56.25,0
                40.8333,56.25,0
                40.8333,56.1667,0
              </coordinates>
            </LinearRing>
          </outerBoundaryIs>
        </Polygon>
      </Placemark>
      <Placemark>
        <name>З17</name>
        <description>Квадрат 317</description>
        <styleUrl>#poly-000000-1000-0</styleUrl>
        <Polygon>
          <outerBoundaryIs>
            <LinearRing>
              <tessellate>1</tessellate>
              <coordinates>
                41,56.1667,0
                41.1667,56.1667,0
                41.1667,56.25,0
                41,56.25,0
                41,56.1667,0
              </coordinates>
            </LinearRing>
          </outerBoundaryIs>
        </Polygon>
      </Placemark>
      <Placemark>
        <name>З18</name>
        <description>Квадрат 318</description>
        <styleUrl>#poly-000000-1000-0</styleUrl>
        <Polygon>
          <outerBoundaryIs>
            <LinearRing>
              <tessellate>1</tessellate>
              <coordinates>
                41.1667,56.1667,0
                41.3333,56.1667,0
                41.3333,56.25,0
                41.1667,56.25,0
                41.1667,56.1667,0
              </coordinates>
            </LinearRing>
          </outerBoundaryIs>
        </Polygon>
      </Placemark>
      <Placemark>
        <name>З19</name>
        <description>Квадрат 319</description>
        <styleUrl>#poly-000000-1000-0</styleUrl>
        <Polygon>
          <outerBoundaryIs>
            <LinearRing>
              <tessellate>1</tessellate>
              <coordinates>
                41.3333,56.1667,0
                41.5,56.1667,0
                41.5,56.25,0
                41.3333,56.25,0
                41.3333,56.1667,0
              </coordinates>
            </LinearRing>
          </outerBoundaryIs>
        </Polygon>
      </Placemark>
      <Placemark>
        <name>З20</name>
        <description>Квадрат 320</description>
        <styleUrl>#poly-000000-1000-0</styleUrl>
        <Polygon>
          <outerBoundaryIs>
            <LinearRing>
              <tessellate>1</tessellate>
              <coordinates>
                41.5,56.1667,0
                41.6667,56.1667,0
                41.6667,56.25,0
                41.5,56.25,0
                41.5,56.1667,0
              </coordinates>
            </LinearRing>
          </outerBoundaryIs>
        </Polygon>
      </Placemark>
      <Placemark>
        <name>З21</name>
        <description>Квадрат 321</description>
        <styleUrl>#poly-000000-1000-0</styleUrl>
        <Polygon>
          <outerBoundaryIs>
            <LinearRing>
              <tessellate>1</tessellate>
              <coordinates>
                41.6667,56.1667,0
                41.8333,56.1667,0
                41.8333,56.25,0
                41.6667,56.25,0
                41.6667,56.1667,0
              </coordinates>
            </LinearRing>
          </outerBoundaryIs>
        </Polygon>
      </Placemark>
      <Placemark>
        <name>З22</name>
        <description>Квадрат 322</description>
        <styleUrl>#poly-000000-1000-0</styleUrl>
        <Polygon>
          <outerBoundaryIs>
            <LinearRing>
              <tessellate>1</tessellate>
              <coordinates>
                41.8333,56.1667,0
                42,56.1667,0
                42,56.25,0
                41.8333,56.25,0
                41.8333,56.1667,0
              </coordinates>
            </LinearRing>
          </outerBoundaryIs>
        </Polygon>
      </Placemark>
      <Placemark>
        <name>З23</name>
        <description>Квадрат 323</description>
        <styleUrl>#poly-000000-1000-0</styleUrl>
        <Polygon>
          <outerBoundaryIs>
            <LinearRing>
              <tessellate>1</tessellate>
              <coordinates>
                42,56.1667,0
                42.1667,56.1667,0
                42.1667,56.25,0
                42,56.25,0
                42,56.1667,0
              </coordinates>
            </LinearRing>
          </outerBoundaryIs>
        </Polygon>
      </Placemark>
      <Placemark>
        <name>З24</name>
        <description>Квадрат 324</description>
        <styleUrl>#poly-000000-1000-0</styleUrl>
        <Polygon>
          <outerBoundaryIs>
            <LinearRing>
              <tessellate>1</tessellate>
              <coordinates>
                42.1667,56.1667,0
                42.3333,56.1667,0
                42.3333,56.25,0
                42.1667,56.25,0
                42.1667,56.1667,0
              </coordinates>
            </LinearRing>
          </outerBoundaryIs>
        </Polygon>
      </Placemark>
      <Placemark>
        <name>З25</name>
        <description>Квадрат 325</description>
        <styleUrl>#poly-000000-1000-0</styleUrl>
        <Polygon>
          <outerBoundaryIs>
            <LinearRing>
              <tessellate>1</tessellate>
              <coordinates>
                42.3333,56.1667,0
                42.5,56.1667,0
                42.5,56.25,0
                42.3333,56.25,0
                42.3333,56.1667,0
              </coordinates>
            </LinearRing>
          </outerBoundaryIs>
        </Polygon>
      </Placemark>
      <Placemark>
        <name>З26</name>
        <description>Квадрат 326</description>
        <styleUrl>#poly-000000-1000-0</styleUrl>
        <Polygon>
          <outerBoundaryIs>
            <LinearRing>
              <tessellate>1</tessellate>
              <coordinates>
                42.5,56.1667,0
                42.6667,56.1667,0
                42.6667,56.25,0
                42.5,56.25,0
                42.5,56.1667,0
              </coordinates>
            </LinearRing>
          </outerBoundaryIs>
        </Polygon>
      </Placemark>
      <Placemark>
        <name>З27</name>
        <description>Квадрат 327</description>
        <styleUrl>#poly-000000-1000-0</styleUrl>
        <Polygon>
          <outerBoundaryIs>
            <LinearRing>
              <tessellate>1</tessellate>
              <coordinates>
                42.6667,56.1667,0
                42.8333,56.1667,0
                42.8333,56.25,0
                42.6667,56.25,0
                42.6667,56.1667,0
              </coordinates>
            </LinearRing>
          </outerBoundaryIs>
        </Polygon>
      </Placemark>
      <Placemark>
        <name>З28</name>
        <description>Квадрат 328</description>
        <styleUrl>#poly-000000-1000-0</styleUrl>
        <Polygon>
          <outerBoundaryIs>
            <LinearRing>
              <tessellate>1</tessellate>
              <coordinates>
                42.8333,56.125,0
                43,56.125,0
                43,56.2083,0
                42.8333,56.2083,0
                42.8333,56.125,0
              </coordinates>
            </LinearRing>
          </outerBoundaryIs>
        </Polygon>
      </Placemark>
      <Placemark>
        <name>И1</name>
        <description>Квадрат И1</description>
        <styleUrl>#poly-000000-1000-0</styleUrl>
        <Polygon>
          <outerBoundaryIs>
            <LinearRing>
              <tessellate>1</tessellate>
              <coordinates>
                38.5,56.0833,0
                38.6667,56.0833,0
                38.6667,56.1667,0
                38.5,56.1667,0
                38.5,56.0833,0
              </coordinates>
            </LinearRing>
          </outerBoundaryIs>
        </Polygon>
      </Placemark>
      <Placemark>
        <name>И2</name>
        <description>Квадрат И2</description>
        <styleUrl>#poly-000000-1000-0</styleUrl>
        <Polygon>
          <outerBoundaryIs>
            <LinearRing>
              <tessellate>1</tessellate>
              <coordinates>
                38.6667,56.0833,0
                38.8333,56.0833,0
                38.8333,56.1667,0
                38.6667,56.1667,0
                38.6667,56.0833,0
              </coordinates>
            </LinearRing>
          </outerBoundaryIs>
        </Polygon>
      </Placemark>
      <Placemark>
        <name>И3</name>
        <description>Квадрат И3</description>
        <styleUrl>#poly-000000-1000-0</styleUrl>
        <Polygon>
          <outerBoundaryIs>
            <LinearRing>
              <tessellate>1</tessellate>
              <coordinates>
                38.8333,56.0833,0
                39,56.0833,0
                39,56.1667,0
                38.8333,56.1667,0
                38.8333,56.0833,0
              </coordinates>
            </LinearRing>
          </outerBoundaryIs>
        </Polygon>
      </Placemark>
      <Placemark>
        <name>И4</name>
        <description>Квадрат И4</description>
        <styleUrl>#poly-000000-1000-0</styleUrl>
        <Polygon>
          <outerBoundaryIs>
            <LinearRing>
              <tessellate>1</tessellate>
              <coordinates>
                39,56.0833,0
                39.1667,56.0833,0
                39.1667,56.1667,0
                39,56.1667,0
                39,56.0833,0
              </coordinates>
            </LinearRing>
          </outerBoundaryIs>
        </Polygon>
      </Placemark>
      <Placemark>
        <name>И5</name>
        <description>Квадрат И5</description>
        <styleUrl>#poly-000000-1000-0</styleUrl>
        <Polygon>
          <outerBoundaryIs>
            <LinearRing>
              <tessellate>1</tessellate>
              <coordinates>
                39.1667,56.0833,0
                39.3333,56.0833,0
                39.3333,56.1667,0
                39.1667,56.1667,0
                39.1667,56.0833,0
              </coordinates>
            </LinearRing>
          </outerBoundaryIs>
        </Polygon>
      </Placemark>
      <Placemark>
        <name>И6</name>
        <description>Квадрат И6</description>
        <styleUrl>#poly-000000-1000-0</styleUrl>
        <Polygon>
          <outerBoundaryIs>
            <LinearRing>
              <tessellate>1</tessellate>
              <coordinates>
                39.3333,56.0833,0
                39.5,56.0833,0
                39.5,56.1667,0
                39.3333,56.1667,0
                39.3333,56.0833,0
              </coordinates>
            </LinearRing>
          </outerBoundaryIs>
        </Polygon>
      </Placemark>
      <Placemark>
        <name>И7</name>
        <description>Квадрат И7</description>
        <styleUrl>#poly-000000-1000-0</styleUrl>
        <Polygon>
          <outerBoundaryIs>
            <LinearRing>
              <tessellate>1</tessellate>
              <coordinates>
                39.5,56.0833,0
                39.6667,56.0833,0
                39.6667,56.1667,0
                39.5,56.1667,0
                39.5,56.0833,0
              </coordinates>
            </LinearRing>
          </outerBoundaryIs>
        </Polygon>
      </Placemark>
      <Placemark>
        <name>И8</name>
        <description>Квадрат И8</description>
        <styleUrl>#poly-000000-1000-0</styleUrl>
        <Polygon>
          <outerBoundaryIs>
            <LinearRing>
              <tessellate>1</tessellate>
              <coordinates>
                39.6667,56.0833,0
                39.8333,56.0833,0
                39.8333,56.1667,0
                39.6667,56.1667,0
                39.6667,56.0833,0
              </coordinates>
            </LinearRing>
          </outerBoundaryIs>
        </Polygon>
      </Placemark>
      <Placemark>
        <name>И9</name>
        <description>Квадрат И9</description>
        <styleUrl>#poly-000000-1000-0</styleUrl>
        <Polygon>
          <outerBoundaryIs>
            <LinearRing>
              <tessellate>1</tessellate>
              <coordinates>
                39.8333,56.0833,0
                40,56.0833,0
                40,56.1667,0
                39.8333,56.1667,0
                39.8333,56.0833,0
              </coordinates>
            </LinearRing>
          </outerBoundaryIs>
        </Polygon>
      </Placemark>
      <Placemark>
        <name>И10</name>
        <description>Квадрат И10</description>
        <styleUrl>#poly-000000-1000-0</styleUrl>
        <Polygon>
          <outerBoundaryIs>
            <LinearRing>
              <tessellate>1</tessellate>
              <coordinates>
                40,56.0833,0
                40.1667,56.0833,0
                40.1667,56.1667,0
                40,56.1667,0
                40,56.0833,0
              </coordinates>
            </LinearRing>
          </outerBoundaryIs>
        </Polygon>
      </Placemark>
      <Placemark>
        <name>И11</name>
        <description>Квадрат И11</description>
        <styleUrl>#poly-000000-1000-0</styleUrl>
        <Polygon>
          <outerBoundaryIs>
            <LinearRing>
              <tessellate>1</tessellate>
              <coordinates>
                40.1667,56.0833,0
                40.3333,56.0833,0
                40.3333,56.1667,0
                40.1667,56.1667,0
                40.1667,56.0833,0
              </coordinates>
            </LinearRing>
          </outerBoundaryIs>
        </Polygon>
      </Placemark>
      <Placemark>
        <name>И12</name>
        <description>Квадрат И12</description>
        <styleUrl>#poly-000000-1000-0</styleUrl>
        <Polygon>
          <outerBoundaryIs>
            <LinearRing>
              <tessellate>1</tessellate>
              <coordinates>
                40.3333,56.0833,0
                40.5,56.0833,0
                40.5,56.1667,0
                40.3333,56.1667,0
                40.3333,56.0833,0
              </coordinates>
            </LinearRing>
          </outerBoundaryIs>
        </Polygon>
      </Placemark>
      <Placemark>
        <name>И13</name>
        <description>Квадрат И13</description>
        <styleUrl>#poly-000000-1000-0</styleUrl>
        <Polygon>
          <outerBoundaryIs>
            <LinearRing>
              <tessellate>1</tessellate>
              <coordinates>
                40.5,56.0833,0
                40.6667,56.0833,0
                40.6667,56.1667,0
                40.5,56.1667,0
                40.5,56.0833,0
              </coordinates>
            </LinearRing>
          </outerBoundaryIs>
        </Polygon>
      </Placemark>
      <Placemark>
        <name>И14</name>
        <description>Квадрат И14</description>
        <styleUrl>#poly-000000-1000-0</styleUrl>
        <Polygon>
          <outerBoundaryIs>
            <LinearRing>
              <tessellate>1</tessellate>
              <coordinates>
                40.6667,56.0833,0
                40.8333,56.0833,0
                40.8333,56.1667,0
                40.6667,56.1667,0
                40.6667,56.0833,0
              </coordinates>
            </LinearRing>
          </outerBoundaryIs>
        </Polygon>
      </Placemark>
      <Placemark>
        <name>И15</name>
        <description>Квадрат И15</description>
        <styleUrl>#poly-000000-1000-0</styleUrl>
        <Polygon>
          <outerBoundaryIs>
            <LinearRing>
              <tessellate>1</tessellate>
              <coordinates>
                40.8333,56.0833,0
                41,56.0833,0
                41,56.1667,0
                40.8333,56.1667,0
                40.8333,56.0833,0
              </coordinates>
            </LinearRing>
          </outerBoundaryIs>
        </Polygon>
      </Placemark>
      <Placemark>
        <name>И16</name>
        <description>Квадрат И16</description>
        <styleUrl>#poly-000000-1000-0</styleUrl>
        <Polygon>
          <outerBoundaryIs>
            <LinearRing>
              <tessellate>1</tessellate>
              <coordinates>
                41,56.0833,0
                41.1667,56.0833,0
                41.1667,56.1667,0
                41,56.1667,0
                41,56.0833,0
              </coordinates>
            </LinearRing>
          </outerBoundaryIs>
        </Polygon>
      </Placemark>
      <Placemark>
        <name>И17</name>
        <description>Квадрат И17</description>
        <styleUrl>#poly-000000-1000-0</styleUrl>
        <Polygon>
          <outerBoundaryIs>
            <LinearRing>
              <tessellate>1</tessellate>
              <coordinates>
                41.1667,56.0833,0
                41.3333,56.0833,0
                41.3333,56.1667,0
                41.1667,56.1667,0
                41.1667,56.0833,0
              </coordinates>
            </LinearRing>
          </outerBoundaryIs>
        </Polygon>
      </Placemark>
      <Placemark>
        <name>И18</name>
        <description>Квадрат И18</description>
        <styleUrl>#poly-000000-1000-0</styleUrl>
        <Polygon>
          <outerBoundaryIs>
            <LinearRing>
              <tessellate>1</tessellate>
              <coordinates>
                41.3333,56.0833,0
                41.5,56.0833,0
                41.5,56.1667,0
                41.3333,56.1667,0
                41.3333,56.0833,0
              </coordinates>
            </LinearRing>
          </outerBoundaryIs>
        </Polygon>
      </Placemark>
      <Placemark>
        <name>И19</name>
        <description>Квадрат И19</description>
        <styleUrl>#poly-000000-1000-0</styleUrl>
        <Polygon>
          <outerBoundaryIs>
            <LinearRing>
              <tessellate>1</tessellate>
              <coordinates>
                41.5,56.0833,0
                41.6667,56.0833,0
                41.6667,56.1667,0
                41.5,56.1667,0
                41.5,56.0833,0
              </coordinates>
            </LinearRing>
          </outerBoundaryIs>
        </Polygon>
      </Placemark>
      <Placemark>
        <name>И20</name>
        <description>Квадрат И20</description>
        <styleUrl>#poly-000000-1000-0</styleUrl>
        <Polygon>
          <outerBoundaryIs>
            <LinearRing>
              <tessellate>1</tessellate>
              <coordinates>
                41.6667,56.0833,0
                41.8333,56.0833,0
                41.8333,56.1667,0
                41.6667,56.1667,0
                41.6667,56.0833,0
              </coordinates>
            </LinearRing>
          </outerBoundaryIs>
        </Polygon>
      </Placemark>
      <Placemark>
        <name>И21</name>
        <description>Квадрат И21</description>
        <styleUrl>#poly-000000-1000-0</styleUrl>
        <Polygon>
          <outerBoundaryIs>
            <LinearRing>
              <tessellate>1</tessellate>
              <coordinates>
                41.8333,56.0833,0
                42,56.0833,0
                42,56.1667,0
                41.8333,56.1667,0
                41.8333,56.0833,0
              </coordinates>
            </LinearRing>
          </outerBoundaryIs>
        </Polygon>
      </Placemark>
      <Placemark>
        <name>И22</name>
        <description>Квадрат И22</description>
        <styleUrl>#poly-000000-1000-0</styleUrl>
        <Polygon>
          <outerBoundaryIs>
            <LinearRing>
              <tessellate>1</tessellate>
              <coordinates>
                42,56.0833,0
                42.1667,56.0833,0
                42.1667,56.1667,0
                42,56.1667,0
                42,56.0833,0
              </coordinates>
            </LinearRing>
          </outerBoundaryIs>
        </Polygon>
      </Placemark>
      <Placemark>
        <name>И23</name>
        <description>Квадрат И23</description>
        <styleUrl>#poly-000000-1000-0</styleUrl>
        <Polygon>
          <outerBoundaryIs>
            <LinearRing>
              <tessellate>1</tessellate>
              <coordinates>
                42.1667,56.0833,0
                42.3333,56.0833,0
                42.3333,56.1667,0
                42.1667,56.1667,0
                42.1667,56.0833,0
              </coordinates>
            </LinearRing>
          </outerBoundaryIs>
        </Polygon>
      </Placemark>
      <Placemark>
        <name>И24</name>
        <description>Квадрат И24</description>
        <styleUrl>#poly-000000-1000-0</styleUrl>
        <Polygon>
          <outerBoundaryIs>
            <LinearRing>
              <tessellate>1</tessellate>
              <coordinates>
                42.3333,56.0833,0
                42.5,56.0833,0
                42.5,56.1667,0
                42.3333,56.1667,0
                42.3333,56.0833,0
              </coordinates>
            </LinearRing>
          </outerBoundaryIs>
        </Polygon>
      </Placemark>
      <Placemark>
        <name>И25</name>
        <description>Квадрат И25</description>
        <styleUrl>#poly-000000-1000-0</styleUrl>
        <Polygon>
          <outerBoundaryIs>
            <LinearRing>
              <tessellate>1</tessellate>
              <coordinates>
                42.5,56.0833,0
                42.6667,56.0833,0
                42.6667,56.1667,0
                42.5,56.1667,0
                42.5,56.0833,0
              </coordinates>
            </LinearRing>
          </outerBoundaryIs>
        </Polygon>
      </Placemark>
      <Placemark>
        <name>И26</name>
        <description>Квадрат И26</description>
        <styleUrl>#poly-000000-1000-0</styleUrl>
        <Polygon>
          <outerBoundaryIs>
            <LinearRing>
              <tessellate>1</tessellate>
              <coordinates>
                42.6667,56.0833,0
                42.8333,56.0833,0
                42.8333,56.1667,0
                42.6667,56.1667,0
                42.6667,56.0833,0
              </coordinates>
            </LinearRing>
          </outerBoundaryIs>
        </Polygon>
      </Placemark>
      <Placemark>
        <name>К1</name>
        <description>Квадрат К1</description>
        <styleUrl>#poly-000000-1000-0</styleUrl>
        <Polygon>
          <outerBoundaryIs>
            <LinearRing>
              <tessellate>1</tessellate>
              <coordinates>
                38.5,56,0
                38.6667,56,0
                38.6667,56.0833,0
                38.5,56.0833,0
                38.5,56,0
              </coordinates>
            </LinearRing>
          </outerBoundaryIs>
        </Polygon>
      </Placemark>
      <Placemark>
        <name>К2</name>
        <description>Квадрат К2</description>
        <styleUrl>#poly-000000-1000-0</styleUrl>
        <Polygon>
          <outerBoundaryIs>
            <LinearRing>
              <tessellate>1</tessellate>
              <coordinates>
                38.6667,56,0
                38.8333,56,0
                38.8333,56.0833,0
                38.6667,56.0833,0
                38.6667,56,0
              </coordinates>
            </LinearRing>
          </outerBoundaryIs>
        </Polygon>
      </Placemark>
      <Placemark>
        <name>К3</name>
        <description>Квадрат К3</description>
        <styleUrl>#poly-000000-1000-0</styleUrl>
        <Polygon>
          <outerBoundaryIs>
            <LinearRing>
              <tessellate>1</tessellate>
              <coordinates>
                38.8333,56,0
                39,56,0
                39,56.0833,0
                38.8333,56.0833,0
                38.8333,56,0
              </coordinates>
            </LinearRing>
          </outerBoundaryIs>
        </Polygon>
      </Placemark>
      <Placemark>
        <name>К4</name>
        <description>Квадрат К4</description>
        <styleUrl>#poly-000000-1000-0</styleUrl>
        <Polygon>
          <outerBoundaryIs>
            <LinearRing>
              <tessellate>1</tessellate>
              <coordinates>
                39,56,0
                39.1667,56,0
                39.1667,56.0833,0
                39,56.0833,0
                39,56,0
              </coordinates>
            </LinearRing>
          </outerBoundaryIs>
        </Polygon>
      </Placemark>
      <Placemark>
        <name>К5</name>
        <description>Квадрат К5</description>
        <styleUrl>#poly-000000-1000-0</styleUrl>
        <Polygon>
          <outerBoundaryIs>
            <LinearRing>
              <tessellate>1</tessellate>
              <coordinates>
                39.1667,56,0
                39.3333,56,0
                39.3333,56.0833,0
                39.1667,56.0833,0
                39.1667,56,0
              </coordinates>
            </LinearRing>
          </outerBoundaryIs>
        </Polygon>
      </Placemark>
      <Placemark>
        <name>К6</name>
        <description>Квадрат К6</description>
        <styleUrl>#poly-000000-1000-0</styleUrl>
        <Polygon>
          <outerBoundaryIs>
            <LinearRing>
              <tessellate>1</tessellate>
              <coordinates>
                39.3333,56,0
                39.5,56,0
                39.5,56.0833,0
                39.3333,56.0833,0
                39.3333,56,0
              </coordinates>
            </LinearRing>
          </outerBoundaryIs>
        </Polygon>
      </Placemark>
      <Placemark>
        <name>К7</name>
        <description>Квадрат К7</description>
        <styleUrl>#poly-000000-1000-0</styleUrl>
        <Polygon>
          <outerBoundaryIs>
            <LinearRing>
              <tessellate>1</tessellate>
              <coordinates>
                39.5,56,0
                39.6667,56,0
                39.6667,56.0833,0
                39.5,56.0833,0
                39.5,56,0
              </coordinates>
            </LinearRing>
          </outerBoundaryIs>
        </Polygon>
      </Placemark>
      <Placemark>
        <name>К8</name>
        <description>Квадрат К8</description>
        <styleUrl>#poly-000000-1000-0</styleUrl>
        <Polygon>
          <outerBoundaryIs>
            <LinearRing>
              <tessellate>1</tessellate>
              <coordinates>
                39.6667,56,0
                39.8333,56,0
                39.8333,56.0833,0
                39.6667,56.0833,0
                39.6667,56,0
              </coordinates>
            </LinearRing>
          </outerBoundaryIs>
        </Polygon>
      </Placemark>
      <Placemark>
        <name>К9</name>
        <description>Квадрат К9</description>
        <styleUrl>#poly-000000-1000-0</styleUrl>
        <Polygon>
          <outerBoundaryIs>
            <LinearRing>
              <tessellate>1</tessellate>
              <coordinates>
                39.8333,56,0
                40,56,0
                40,56.0833,0
                39.8333,56.0833,0
                39.8333,56,0
              </coordinates>
            </LinearRing>
          </outerBoundaryIs>
        </Polygon>
      </Placemark>
      <Placemark>
        <name>К10</name>
        <description>Квадрат К10</description>
        <styleUrl>#poly-000000-1000-0</styleUrl>
        <Polygon>
          <outerBoundaryIs>
            <LinearRing>
              <tessellate>1</tessellate>
              <coordinates>
                40,56,0
                40.1667,56,0
                40.1667,56.0833,0
                40,56.0833,0
                40,56,0
              </coordinates>
            </LinearRing>
          </outerBoundaryIs>
        </Polygon>
      </Placemark>
      <Placemark>
        <name>К11</name>
        <description>Квадрат К11</description>
        <styleUrl>#poly-000000-1000-0</styleUrl>
        <Polygon>
          <outerBoundaryIs>
            <LinearRing>
              <tessellate>1</tessellate>
              <coordinates>
                40.1667,56,0
                40.3333,56,0
                40.3333,56.0833,0
                40.1667,56.0833,0
                40.1667,56,0
              </coordinates>
            </LinearRing>
          </outerBoundaryIs>
        </Polygon>
      </Placemark>
      <Placemark>
        <name>К12</name>
        <description>Квадрат К12</description>
        <styleUrl>#poly-000000-1000-0</styleUrl>
        <Polygon>
          <outerBoundaryIs>
            <LinearRing>
              <tessellate>1</tessellate>
              <coordinates>
                40.3333,56,0
                40.5,56,0
                40.5,56.0833,0
                40.3333,56.0833,0
                40.3333,56,0
              </coordinates>
            </LinearRing>
          </outerBoundaryIs>
        </Polygon>
      </Placemark>
      <Placemark>
        <name>К13</name>
        <description>Квадрат К13</description>
        <styleUrl>#poly-000000-1000-0</styleUrl>
        <Polygon>
          <outerBoundaryIs>
            <LinearRing>
              <tessellate>1</tessellate>
              <coordinates>
                40.5,56,0
                40.6667,56,0
                40.6667,56.0833,0
                40.5,56.0833,0
                40.5,56,0
              </coordinates>
            </LinearRing>
          </outerBoundaryIs>
        </Polygon>
      </Placemark>
      <Placemark>
        <name>К14</name>
        <description>Квадрат К14</description>
        <styleUrl>#poly-000000-1000-0</styleUrl>
        <Polygon>
          <outerBoundaryIs>
            <LinearRing>
              <tessellate>1</tessellate>
              <coordinates>
                40.6667,56,0
                40.8333,56,0
                40.8333,56.0833,0
                40.6667,56.0833,0
                40.6667,56,0
              </coordinates>
            </LinearRing>
          </outerBoundaryIs>
        </Polygon>
      </Placemark>
      <Placemark>
        <name>К15</name>
        <description>Квадрат К15</description>
        <styleUrl>#poly-000000-1000-0</styleUrl>
        <Polygon>
          <outerBoundaryIs>
            <LinearRing>
              <tessellate>1</tessellate>
              <coordinates>
                40.8333,56,0
                41,56,0
                41,56.0833,0
                40.8333,56.0833,0
                40.8333,56,0
              </coordinates>
            </LinearRing>
          </outerBoundaryIs>
        </Polygon>
      </Placemark>
      <Placemark>
        <name>К16</name>
        <description>Квадрат К16</description>
        <styleUrl>#poly-000000-1000-0</styleUrl>
        <Polygon>
          <outerBoundaryIs>
            <LinearRing>
              <tessellate>1</tessellate>
              <coordinates>
                41,56,0
                41.1667,56,0
                41.1667,56.0833,0
                41,56.0833,0
                41,56,0
              </coordinates>
            </LinearRing>
          </outerBoundaryIs>
        </Polygon>
      </Placemark>
      <Placemark>
        <name>К17</name>
        <description>Квадрат К17</description>
        <styleUrl>#poly-000000-1000-0</styleUrl>
        <Polygon>
          <outerBoundaryIs>
            <LinearRing>
              <tessellate>1</tessellate>
              <coordinates>
                41.1667,56,0
                41.3333,56,0
                41.3333,56.0833,0
                41.1667,56.0833,0
                41.1667,56,0
              </coordinates>
            </LinearRing>
          </outerBoundaryIs>
        </Polygon>
      </Placemark>
      <Placemark>
        <name>К18</name>
        <description>Квадрат К18</description>
        <styleUrl>#poly-000000-1000-0</styleUrl>
        <Polygon>
          <outerBoundaryIs>
            <LinearRing>
              <tessellate>1</tessellate>
              <coordinates>
                41.3333,56,0
                41.5,56,0
                41.5,56.0833,0
                41.3333,56.0833,0
                41.3333,56,0
              </coordinates>
            </LinearRing>
          </outerBoundaryIs>
        </Polygon>
      </Placemark>
      <Placemark>
        <name>К19</name>
        <description>Квадрат К19</description>
        <styleUrl>#poly-000000-1000-0</styleUrl>
        <Polygon>
          <outerBoundaryIs>
            <LinearRing>
              <tessellate>1</tessellate>
              <coordinates>
                41.5,56,0
                41.6667,56,0
                41.6667,56.0833,0
                41.5,56.0833,0
                41.5,56,0
              </coordinates>
            </LinearRing>
          </outerBoundaryIs>
        </Polygon>
      </Placemark>
      <Placemark>
        <name>К20</name>
        <description>Квадрат К20</description>
        <styleUrl>#poly-000000-1000-0</styleUrl>
        <Polygon>
          <outerBoundaryIs>
            <LinearRing>
              <tessellate>1</tessellate>
              <coordinates>
                41.6667,56,0
                41.8333,56,0
                41.8333,56.0833,0
                41.6667,56.0833,0
                41.6667,56,0
              </coordinates>
            </LinearRing>
          </outerBoundaryIs>
        </Polygon>
      </Placemark>
      <Placemark>
        <name>К21</name>
        <description>Квадрат К21</description>
        <styleUrl>#poly-000000-1000-0</styleUrl>
        <Polygon>
          <outerBoundaryIs>
            <LinearRing>
              <tessellate>1</tessellate>
              <coordinates>
                41.8333,56,0
                42,56,0
                42,56.0833,0
                41.8333,56.0833,0
                41.8333,56,0
              </coordinates>
            </LinearRing>
          </outerBoundaryIs>
        </Polygon>
      </Placemark>
      <Placemark>
        <name>К22</name>
        <description>Квадрат К22</description>
        <styleUrl>#poly-000000-1000-0</styleUrl>
        <Polygon>
          <outerBoundaryIs>
            <LinearRing>
              <tessellate>1</tessellate>
              <coordinates>
                42,56,0
                42.1667,56,0
                42.1667,56.0833,0
                42,56.0833,0
                42,56,0
              </coordinates>
            </LinearRing>
          </outerBoundaryIs>
        </Polygon>
      </Placemark>
      <Placemark>
        <name>К23</name>
        <description>Квадрат К23</description>
        <styleUrl>#poly-000000-1000-0</styleUrl>
        <Polygon>
          <outerBoundaryIs>
            <LinearRing>
              <tessellate>1</tessellate>
              <coordinates>
                42.1667,56,0
                42.3333,56,0
                42.3333,56.0833,0
                42.1667,56.0833,0
                42.1667,56,0
              </coordinates>
            </LinearRing>
          </outerBoundaryIs>
        </Polygon>
      </Placemark>
      <Placemark>
        <name>К24</name>
        <description>Квадрат К24</description>
        <styleUrl>#poly-000000-1000-0</styleUrl>
        <Polygon>
          <outerBoundaryIs>
            <LinearRing>
              <tessellate>1</tessellate>
              <coordinates>
                42.3333,56,0
                42.5,56,0
                42.5,56.0833,0
                42.3333,56.0833,0
                42.3333,56,0
              </coordinates>
            </LinearRing>
          </outerBoundaryIs>
        </Polygon>
      </Placemark>
      <Placemark>
        <name>К25</name>
        <description>Квадрат К25</description>
        <styleUrl>#poly-000000-1000-0</styleUrl>
        <Polygon>
          <outerBoundaryIs>
            <LinearRing>
              <tessellate>1</tessellate>
              <coordinates>
                42.5,56,0
                42.6667,56,0
                42.6667,56.0833,0
                42.5,56.0833,0
                42.5,56,0
              </coordinates>
            </LinearRing>
          </outerBoundaryIs>
        </Polygon>
      </Placemark>
      <Placemark>
        <name>К26</name>
        <description>Квадрат К26</description>
        <styleUrl>#poly-000000-1000-0</styleUrl>
        <Polygon>
          <outerBoundaryIs>
            <LinearRing>
              <tessellate>1</tessellate>
              <coordinates>
                42.6667,56,0
                42.8333,56,0
                42.8333,56.0833,0
                42.6667,56.0833,0
                42.6667,56,0
              </coordinates>
            </LinearRing>
          </outerBoundaryIs>
        </Polygon>
      </Placemark>
      <Placemark>
        <name>Л1</name>
        <description>Квадрат Л1</description>
        <styleUrl>#poly-000000-1000-0</styleUrl>
        <Polygon>
          <outerBoundaryIs>
            <LinearRing>
              <tessellate>1</tessellate>
              <coordinates>
                38.6667,55.9167,0
                38.8333,55.9167,0
                38.8333,56,0
                38.6667,56,0
                38.6667,55.9167,0
              </coordinates>
            </LinearRing>
          </outerBoundaryIs>
        </Polygon>
      </Placemark>
      <Placemark>
        <name>Л2</name>
        <description>Квадрат Л2</description>
        <styleUrl>#poly-000000-1000-0</styleUrl>
        <Polygon>
          <outerBoundaryIs>
            <LinearRing>
              <tessellate>1</tessellate>
              <coordinates>
                38.8333,55.9167,0
                39,55.9167,0
                39,56,0
                38.8333,56,0
                38.8333,55.9167,0
              </coordinates>
            </LinearRing>
          </outerBoundaryIs>
        </Polygon>
      </Placemark>
      <Placemark>
        <name>Л3</name>
        <description>Квадрат Л3</description>
        <styleUrl>#poly-000000-1000-0</styleUrl>
        <Polygon>
          <outerBoundaryIs>
            <LinearRing>
              <tessellate>1</tessellate>
              <coordinates>
                39,55.9167,0
                39.1667,55.9167,0
                39.1667,56,0
                39,56,0
                39,55.9167,0
              </coordinates>
            </LinearRing>
          </outerBoundaryIs>
        </Polygon>
      </Placemark>
      <Placemark>
        <name>Л4</name>
        <description>Квадрат Л4</description>
        <styleUrl>#poly-000000-1000-0</styleUrl>
        <Polygon>
          <outerBoundaryIs>
            <LinearRing>
              <tessellate>1</tessellate>
              <coordinates>
                39.1667,55.9167,0
                39.3333,55.9167,0
                39.3333,56,0
                39.1667,56,0
                39.1667,55.9167,0
              </coordinates>
            </LinearRing>
          </outerBoundaryIs>
        </Polygon>
      </Placemark>
      <Placemark>
        <name>Л5</name>
        <description>Квадрат Л5</description>
        <styleUrl>#poly-000000-1000-0</styleUrl>
        <Polygon>
          <outerBoundaryIs>
            <LinearRing>
              <tessellate>1</tessellate>
              <coordinates>
                39.3333,55.9167,0
                39.5,55.9167,0
                39.5,56,0
                39.3333,56,0
                39.3333,55.9167,0
              </coordinates>
            </LinearRing>
          </outerBoundaryIs>
        </Polygon>
      </Placemark>
      <Placemark>
        <name>Л6</name>
        <description>Квадрат Л6</description>
        <styleUrl>#poly-000000-1000-0</styleUrl>
        <Polygon>
          <outerBoundaryIs>
            <LinearRing>
              <tessellate>1</tessellate>
              <coordinates>
                39.5,55.9167,0
                39.6667,55.9167,0
                39.6667,56,0
                39.5,56,0
                39.5,55.9167,0
              </coordinates>
            </LinearRing>
          </outerBoundaryIs>
        </Polygon>
      </Placemark>
      <Placemark>
        <name>Л7</name>
        <description>Квадрат Л7</description>
        <styleUrl>#poly-000000-1000-0</styleUrl>
        <Polygon>
          <outerBoundaryIs>
            <LinearRing>
              <tessellate>1</tessellate>
              <coordinates>
                39.6667,55.9167,0
                39.8333,55.9167,0
                39.8333,56,0
                39.6667,56,0
                39.6667,55.9167,0
              </coordinates>
            </LinearRing>
          </outerBoundaryIs>
        </Polygon>
      </Placemark>
      <Placemark>
        <name>Л8</name>
        <description>Квадрат Л8</description>
        <styleUrl>#poly-000000-1000-0</styleUrl>
        <Polygon>
          <outerBoundaryIs>
            <LinearRing>
              <tessellate>1</tessellate>
              <coordinates>
                39.8333,55.9167,0
                40,55.9167,0
                40,56,0
                39.8333,56,0
                39.8333,55.9167,0
              </coordinates>
            </LinearRing>
          </outerBoundaryIs>
        </Polygon>
      </Placemark>
      <Placemark>
        <name>Л9</name>
        <description>Квадрат Л9</description>
        <styleUrl>#poly-000000-1000-0</styleUrl>
        <Polygon>
          <outerBoundaryIs>
            <LinearRing>
              <tessellate>1</tessellate>
              <coordinates>
                40,55.9167,0
                40.1667,55.9167,0
                40.1667,56,0
                40,56,0
                40,55.9167,0
              </coordinates>
            </LinearRing>
          </outerBoundaryIs>
        </Polygon>
      </Placemark>
      <Placemark>
        <name>Л10</name>
        <description>Квадрат Л10</description>
        <styleUrl>#poly-000000-1000-0</styleUrl>
        <Polygon>
          <outerBoundaryIs>
            <LinearRing>
              <tessellate>1</tessellate>
              <coordinates>
                40.1667,55.9167,0
                40.3333,55.9167,0
                40.3333,56,0
                40.1667,56,0
                40.1667,55.9167,0
              </coordinates>
            </LinearRing>
          </outerBoundaryIs>
        </Polygon>
      </Placemark>
      <Placemark>
        <name>Л11</name>
        <description>Квадрат Л11</description>
        <styleUrl>#poly-000000-1000-0</styleUrl>
        <Polygon>
          <outerBoundaryIs>
            <LinearRing>
              <tessellate>1</tessellate>
              <coordinates>
                40.3333,55.9167,0
                40.5,55.9167,0
                40.5,56,0
                40.3333,56,0
                40.3333,55.9167,0
              </coordinates>
            </LinearRing>
          </outerBoundaryIs>
        </Polygon>
      </Placemark>
      <Placemark>
        <name>Л12</name>
        <description>Квадрат Л12</description>
        <styleUrl>#poly-000000-1000-0</styleUrl>
        <Polygon>
          <outerBoundaryIs>
            <LinearRing>
              <tessellate>1</tessellate>
              <coordinates>
                40.5,55.9167,0
                40.6667,55.9167,0
                40.6667,56,0
                40.5,56,0
                40.5,55.9167,0
              </coordinates>
            </LinearRing>
          </outerBoundaryIs>
        </Polygon>
      </Placemark>
      <Placemark>
        <name>Л13</name>
        <description>Квадрат Л13</description>
        <styleUrl>#poly-000000-1000-0</styleUrl>
        <Polygon>
          <outerBoundaryIs>
            <LinearRing>
              <tessellate>1</tessellate>
              <coordinates>
                40.6667,55.9167,0
                40.8333,55.9167,0
                40.8333,56,0
                40.6667,56,0
                40.6667,55.9167,0
              </coordinates>
            </LinearRing>
          </outerBoundaryIs>
        </Polygon>
      </Placemark>
      <Placemark>
        <name>Л14</name>
        <description>Квадрат Л14</description>
        <styleUrl>#poly-000000-1000-0</styleUrl>
        <Polygon>
          <outerBoundaryIs>
            <LinearRing>
              <tessellate>1</tessellate>
              <coordinates>
                40.8333,55.9167,0
                41,55.9167,0
                41,56,0
                40.8333,56,0
                40.8333,55.9167,0
              </coordinates>
            </LinearRing>
          </outerBoundaryIs>
        </Polygon>
      </Placemark>
      <Placemark>
        <name>Л15</name>
        <description>Квадрат Л15</description>
        <styleUrl>#poly-000000-1000-0</styleUrl>
        <Polygon>
          <outerBoundaryIs>
            <LinearRing>
              <tessellate>1</tessellate>
              <coordinates>
                41,55.9167,0
                41.1667,55.9167,0
                41.1667,56,0
                41,56,0
                41,55.9167,0
              </coordinates>
            </LinearRing>
          </outerBoundaryIs>
        </Polygon>
      </Placemark>
      <Placemark>
        <name>Л16</name>
        <description>Квадрат Л16</description>
        <styleUrl>#poly-000000-1000-0</styleUrl>
        <Polygon>
          <outerBoundaryIs>
            <LinearRing>
              <tessellate>1</tessellate>
              <coordinates>
                41.1667,55.9167,0
                41.3333,55.9167,0
                41.3333,56,0
                41.1667,56,0
                41.1667,55.9167,0
              </coordinates>
            </LinearRing>
          </outerBoundaryIs>
        </Polygon>
      </Placemark>
      <Placemark>
        <name>Л17</name>
        <description>Квадрат Л17</description>
        <styleUrl>#poly-000000-1000-0</styleUrl>
        <Polygon>
          <outerBoundaryIs>
            <LinearRing>
              <tessellate>1</tessellate>
              <coordinates>
                41.3333,55.9167,0
                41.5,55.9167,0
                41.5,56,0
                41.3333,56,0
                41.3333,55.9167,0
              </coordinates>
            </LinearRing>
          </outerBoundaryIs>
        </Polygon>
      </Placemark>
      <Placemark>
        <name>Л18</name>
        <description>Квадрат Л18</description>
        <styleUrl>#poly-000000-1000-0</styleUrl>
        <Polygon>
          <outerBoundaryIs>
            <LinearRing>
              <tessellate>1</tessellate>
              <coordinates>
                41.5,55.9167,0
                41.6667,55.9167,0
                41.6667,56,0
                41.5,56,0
                41.5,55.9167,0
              </coordinates>
            </LinearRing>
          </outerBoundaryIs>
        </Polygon>
      </Placemark>
      <Placemark>
        <name>Л19</name>
        <description>Квадрат Л19</description>
        <styleUrl>#poly-000000-1000-0</styleUrl>
        <Polygon>
          <outerBoundaryIs>
            <LinearRing>
              <tessellate>1</tessellate>
              <coordinates>
                41.6667,55.9167,0
                41.8333,55.9167,0
                41.8333,56,0
                41.6667,56,0
                41.6667,55.9167,0
              </coordinates>
            </LinearRing>
          </outerBoundaryIs>
        </Polygon>
      </Placemark>
      <Placemark>
        <name>Л20</name>
        <description>Квадрат Л20</description>
        <styleUrl>#poly-000000-1000-0</styleUrl>
        <Polygon>
          <outerBoundaryIs>
            <LinearRing>
              <tessellate>1</tessellate>
              <coordinates>
                41.8333,55.9167,0
                42,55.9167,0
                42,56,0
                41.8333,56,0
                41.8333,55.9167,0
              </coordinates>
            </LinearRing>
          </outerBoundaryIs>
        </Polygon>
      </Placemark>
      <Placemark>
        <name>Л21</name>
        <description>Квадрат Л21</description>
        <styleUrl>#poly-000000-1000-0</styleUrl>
        <Polygon>
          <outerBoundaryIs>
            <LinearRing>
              <tessellate>1</tessellate>
              <coordinates>
                42,55.9167,0
                42.1667,55.9167,0
                42.1667,56,0
                42,56,0
                42,55.9167,0
              </coordinates>
            </LinearRing>
          </outerBoundaryIs>
        </Polygon>
      </Placemark>
      <Placemark>
        <name>Л22</name>
        <description>Квадрат Л22</description>
        <styleUrl>#poly-000000-1000-0</styleUrl>
        <Polygon>
          <outerBoundaryIs>
            <LinearRing>
              <tessellate>1</tessellate>
              <coordinates>
                42.1667,55.9167,0
                42.3333,55.9167,0
                42.3333,56,0
                42.1667,56,0
                42.1667,55.9167,0
              </coordinates>
            </LinearRing>
          </outerBoundaryIs>
        </Polygon>
      </Placemark>
      <Placemark>
        <name>Л23</name>
        <description>Квадрат Л23</description>
        <styleUrl>#poly-000000-1000-0</styleUrl>
        <Polygon>
          <outerBoundaryIs>
            <LinearRing>
              <tessellate>1</tessellate>
              <coordinates>
                42.3333,55.9167,0
                42.5,55.9167,0
                42.5,56,0
                42.3333,56,0
                42.3333,55.9167,0
              </coordinates>
            </LinearRing>
          </outerBoundaryIs>
        </Polygon>
      </Placemark>
      <Placemark>
        <name>Л24</name>
        <description>Квадрат Л24</description>
        <styleUrl>#poly-000000-1000-0</styleUrl>
        <Polygon>
          <outerBoundaryIs>
            <LinearRing>
              <tessellate>1</tessellate>
              <coordinates>
                42.5,55.9167,0
                42.6667,55.9167,0
                42.6667,56,0
                42.5,56,0
                42.5,55.9167,0
              </coordinates>
            </LinearRing>
          </outerBoundaryIs>
        </Polygon>
      </Placemark>
      <Placemark>
        <name>М1</name>
        <description>Квадрат М1</description>
        <styleUrl>#poly-000000-1000-0</styleUrl>
        <Polygon>
          <outerBoundaryIs>
            <LinearRing>
              <tessellate>1</tessellate>
              <coordinates>
                39,55.8333,0
                39.1667,55.8333,0
                39.1667,55.9167,0
                39,55.9167,0
                39,55.8333,0
              </coordinates>
            </LinearRing>
          </outerBoundaryIs>
        </Polygon>
      </Placemark>
      <Placemark>
        <name>М2</name>
        <description>Квадрат М2</description>
        <styleUrl>#poly-000000-1000-0</styleUrl>
        <Polygon>
          <outerBoundaryIs>
            <LinearRing>
              <tessellate>1</tessellate>
              <coordinates>
                39.1667,55.8333,0
                39.3333,55.8333,0
                39.3333,55.9167,0
                39.1667,55.9167,0
                39.1667,55.8333,0
              </coordinates>
            </LinearRing>
          </outerBoundaryIs>
        </Polygon>
      </Placemark>
      <Placemark>
        <name>М3</name>
        <description>Квадрат М3</description>
        <styleUrl>#poly-000000-1000-0</styleUrl>
        <Polygon>
          <outerBoundaryIs>
            <LinearRing>
              <tessellate>1</tessellate>
              <coordinates>
                39.3333,55.8333,0
                39.5,55.8333,0
                39.5,55.9167,0
                39.3333,55.9167,0
                39.3333,55.8333,0
              </coordinates>
            </LinearRing>
          </outerBoundaryIs>
        </Polygon>
      </Placemark>
      <Placemark>
        <name>М4</name>
        <description>Квадрат М4</description>
        <styleUrl>#poly-000000-1000-0</styleUrl>
        <Polygon>
          <outerBoundaryIs>
            <LinearRing>
              <tessellate>1</tessellate>
              <coordinates>
                39.5,55.8333,0
                39.6667,55.8333,0
                39.6667,55.9167,0
                39.5,55.9167,0
                39.5,55.8333,0
              </coordinates>
            </LinearRing>
          </outerBoundaryIs>
        </Polygon>
      </Placemark>
      <Placemark>
        <name>М5</name>
        <description>Квадрат М5</description>
        <styleUrl>#poly-000000-1000-0</styleUrl>
        <Polygon>
          <outerBoundaryIs>
            <LinearRing>
              <tessellate>1</tessellate>
              <coordinates>
                39.6667,55.8333,0
                39.8333,55.8333,0
                39.8333,55.9167,0
                39.6667,55.9167,0
                39.6667,55.8333,0
              </coordinates>
            </LinearRing>
          </outerBoundaryIs>
        </Polygon>
      </Placemark>
      <Placemark>
        <name>М6</name>
        <description>Квадрат М6</description>
        <styleUrl>#poly-000000-1000-0</styleUrl>
        <Polygon>
          <outerBoundaryIs>
            <LinearRing>
              <tessellate>1</tessellate>
              <coordinates>
                39.8333,55.8333,0
                40,55.8333,0
                40,55.9167,0
                39.8333,55.9167,0
                39.8333,55.8333,0
              </coordinates>
            </LinearRing>
          </outerBoundaryIs>
        </Polygon>
      </Placemark>
      <Placemark>
        <name>М7</name>
        <description>Квадрат М7</description>
        <styleUrl>#poly-000000-1000-0</styleUrl>
        <Polygon>
          <outerBoundaryIs>
            <LinearRing>
              <tessellate>1</tessellate>
              <coordinates>
                40,55.8333,0
                40.1667,55.8333,0
                40.1667,55.9167,0
                40,55.9167,0
                40,55.8333,0
              </coordinates>
            </LinearRing>
          </outerBoundaryIs>
        </Polygon>
      </Placemark>
      <Placemark>
        <name>М8</name>
        <description>Квадрат М8</description>
        <styleUrl>#poly-000000-1000-0</styleUrl>
        <Polygon>
          <outerBoundaryIs>
            <LinearRing>
              <tessellate>1</tessellate>
              <coordinates>
                40.1667,55.8333,0
                40.3333,55.8333,0
                40.3333,55.9167,0
                40.1667,55.9167,0
                40.1667,55.8333,0
              </coordinates>
            </LinearRing>
          </outerBoundaryIs>
        </Polygon>
      </Placemark>
      <Placemark>
        <name>М9</name>
        <description>Квадрат М9</description>
        <styleUrl>#poly-000000-1000-0</styleUrl>
        <Polygon>
          <outerBoundaryIs>
            <LinearRing>
              <tessellate>1</tessellate>
              <coordinates>
                40.3333,55.8333,0
                40.5,55.8333,0
                40.5,55.9167,0
                40.3333,55.9167,0
                40.3333,55.8333,0
              </coordinates>
            </LinearRing>
          </outerBoundaryIs>
        </Polygon>
      </Placemark>
      <Placemark>
        <name>М10</name>
        <description>Квадрат М10</description>
        <styleUrl>#poly-000000-1000-0</styleUrl>
        <Polygon>
          <outerBoundaryIs>
            <LinearRing>
              <tessellate>1</tessellate>
              <coordinates>
                40.5,55.8333,0
                40.6667,55.8333,0
                40.6667,55.9167,0
                40.5,55.9167,0
                40.5,55.8333,0
              </coordinates>
            </LinearRing>
          </outerBoundaryIs>
        </Polygon>
      </Placemark>
      <Placemark>
        <name>М11</name>
        <description>Квадрат М11</description>
        <styleUrl>#poly-000000-1000-0</styleUrl>
        <Polygon>
          <outerBoundaryIs>
            <LinearRing>
              <tessellate>1</tessellate>
              <coordinates>
                40.6667,55.8333,0
                40.8333,55.8333,0
                40.8333,55.9167,0
                40.6667,55.9167,0
                40.6667,55.8333,0
              </coordinates>
            </LinearRing>
          </outerBoundaryIs>
        </Polygon>
      </Placemark>
      <Placemark>
        <name>М12</name>
        <description>Квадрат М12</description>
        <styleUrl>#poly-000000-1000-0</styleUrl>
        <Polygon>
          <outerBoundaryIs>
            <LinearRing>
              <tessellate>1</tessellate>
              <coordinates>
                40.8333,55.8333,0
                41,55.8333,0
                41,55.9167,0
                40.8333,55.9167,0
                40.8333,55.8333,0
              </coordinates>
            </LinearRing>
          </outerBoundaryIs>
        </Polygon>
      </Placemark>
      <Placemark>
        <name>М13</name>
        <description>Квадрат М13</description>
        <styleUrl>#poly-000000-1000-0</styleUrl>
        <Polygon>
          <outerBoundaryIs>
            <LinearRing>
              <tessellate>1</tessellate>
              <coordinates>
                41,55.8333,0
                41.1667,55.8333,0
                41.1667,55.9167,0
                41,55.9167,0
                41,55.8333,0
              </coordinates>
            </LinearRing>
          </outerBoundaryIs>
        </Polygon>
      </Placemark>
      <Placemark>
        <name>М14</name>
        <description>Квадрат М14</description>
        <styleUrl>#poly-000000-1000-0</styleUrl>
        <Polygon>
          <outerBoundaryIs>
            <LinearRing>
              <tessellate>1</tessellate>
              <coordinates>
                41.1667,55.8333,0
                41.3333,55.8333,0
                41.3333,55.9167,0
                41.1667,55.9167,0
                41.1667,55.8333,0
              </coordinates>
            </LinearRing>
          </outerBoundaryIs>
        </Polygon>
      </Placemark>
      <Placemark>
        <name>М15</name>
        <description>Квадрат М15</description>
        <styleUrl>#poly-000000-1000-0</styleUrl>
        <Polygon>
          <outerBoundaryIs>
            <LinearRing>
              <tessellate>1</tessellate>
              <coordinates>
                41.3333,55.8333,0
                41.5,55.8333,0
                41.5,55.9167,0
                41.3333,55.9167,0
                41.3333,55.8333,0
              </coordinates>
            </LinearRing>
          </outerBoundaryIs>
        </Polygon>
      </Placemark>
      <Placemark>
        <name>М16</name>
        <description>Квадрат М16</description>
        <styleUrl>#poly-000000-1000-0</styleUrl>
        <Polygon>
          <outerBoundaryIs>
            <LinearRing>
              <tessellate>1</tessellate>
              <coordinates>
                41.5,55.8333,0
                41.6667,55.8333,0
                41.6667,55.9167,0
                41.5,55.9167,0
                41.5,55.8333,0
              </coordinates>
            </LinearRing>
          </outerBoundaryIs>
        </Polygon>
      </Placemark>
      <Placemark>
        <name>М17</name>
        <description>Квадрат М17</description>
        <styleUrl>#poly-000000-1000-0</styleUrl>
        <Polygon>
          <outerBoundaryIs>
            <LinearRing>
              <tessellate>1</tessellate>
              <coordinates>
                41.6667,55.8333,0
                41.8333,55.8333,0
                41.8333,55.9167,0
                41.6667,55.9167,0
                41.6667,55.8333,0
              </coordinates>
            </LinearRing>
          </outerBoundaryIs>
        </Polygon>
      </Placemark>
      <Placemark>
        <name>М18</name>
        <description>Квадрат М18</description>
        <styleUrl>#poly-000000-1000-0</styleUrl>
        <Polygon>
          <outerBoundaryIs>
            <LinearRing>
              <tessellate>1</tessellate>
              <coordinates>
                41.8333,55.8333,0
                42,55.8333,0
                42,55.9167,0
                41.8333,55.9167,0
                41.8333,55.8333,0
              </coordinates>
            </LinearRing>
          </outerBoundaryIs>
        </Polygon>
      </Placemark>
      <Placemark>
        <name>М19</name>
        <description>Квадрат М19</description>
        <styleUrl>#poly-000000-1000-0</styleUrl>
        <Polygon>
          <outerBoundaryIs>
            <LinearRing>
              <tessellate>1</tessellate>
              <coordinates>
                42,55.8333,0
                42.1667,55.8333,0
                42.1667,55.9167,0
                42,55.9167,0
                42,55.8333,0
              </coordinates>
            </LinearRing>
          </outerBoundaryIs>
        </Polygon>
      </Placemark>
      <Placemark>
        <name>М20</name>
        <description>Квадрат М20</description>
        <styleUrl>#poly-000000-1000-0</styleUrl>
        <Polygon>
          <outerBoundaryIs>
            <LinearRing>
              <tessellate>1</tessellate>
              <coordinates>
                42.1667,55.8333,0
                42.3333,55.8333,0
                42.3333,55.9167,0
                42.1667,55.9167,0
                42.1667,55.8333,0
              </coordinates>
            </LinearRing>
          </outerBoundaryIs>
        </Polygon>
      </Placemark>
      <Placemark>
        <name>М21</name>
        <description>Квадрат М21</description>
        <styleUrl>#poly-000000-1000-0</styleUrl>
        <Polygon>
          <outerBoundaryIs>
            <LinearRing>
              <tessellate>1</tessellate>
              <coordinates>
                42.3333,55.8333,0
                42.5,55.8333,0
                42.5,55.9167,0
                42.3333,55.9167,0
                42.3333,55.8333,0
              </coordinates>
            </LinearRing>
          </outerBoundaryIs>
        </Polygon>
      </Placemark>
      <Placemark>
        <name>Н1</name>
        <description>Квадрат Н1</description>
        <styleUrl>#poly-000000-1000-0</styleUrl>
        <Polygon>
          <outerBoundaryIs>
            <LinearRing>
              <tessellate>1</tessellate>
              <coordinates>
                39.25,55.75,0
                39.4167,55.75,0
                39.4167,55.8333,0
                39.25,55.8333,0
                39.25,55.75,0
              </coordinates>
            </LinearRing>
          </outerBoundaryIs>
        </Polygon>
      </Placemark>
      <Placemark>
        <name>Н2</name>
        <description>Квадрат Н2</description>
        <styleUrl>#poly-000000-1000-0</styleUrl>
        <Polygon>
          <outerBoundaryIs>
            <LinearRing>
              <tessellate>1</tessellate>
              <coordinates>
                39.4167,55.75,0
                39.5833,55.75,0
                39.5833,55.8333,0
                39.4167,55.8333,0
                39.4167,55.75,0
              </coordinates>
            </LinearRing>
          </outerBoundaryIs>
        </Polygon>
      </Placemark>
      <Placemark>
        <name>Н3</name>
        <description>Квадрат Н3</description>
        <styleUrl>#poly-000000-1000-0</styleUrl>
        <Polygon>
          <outerBoundaryIs>
            <LinearRing>
              <tessellate>1</tessellate>
              <coordinates>
                39.5833,55.75,0
                39.75,55.75,0
                39.75,55.8333,0
                39.5833,55.8333,0
                39.5833,55.75,0
              </coordinates>
            </LinearRing>
          </outerBoundaryIs>
        </Polygon>
      </Placemark>
      <Placemark>
        <name>Н4</name>
        <description>Квадрат Н4</description>
        <styleUrl>#poly-000000-1000-0</styleUrl>
        <Polygon>
          <outerBoundaryIs>
            <LinearRing>
              <tessellate>1</tessellate>
              <coordinates>
                39.8333,55.75,0
                40,55.75,0
                40,55.8333,0
                39.8333,55.8333,0
                39.8333,55.75,0
              </coordinates>
            </LinearRing>
          </outerBoundaryIs>
        </Polygon>
      </Placemark>
      <Placemark>
        <name>Н5</name>
        <description>Квадрат Н5</description>
        <styleUrl>#poly-000000-1000-0</styleUrl>
        <Polygon>
          <outerBoundaryIs>
            <LinearRing>
              <tessellate>1</tessellate>
              <coordinates>
                40,55.75,0
                40.1667,55.75,0
                40.1667,55.8333,0
                40,55.8333,0
                40,55.75,0
              </coordinates>
            </LinearRing>
          </outerBoundaryIs>
        </Polygon>
      </Placemark>
      <Placemark>
        <name>Н6</name>
        <description>Квадрат Н6</description>
        <styleUrl>#poly-000000-1000-0</styleUrl>
        <Polygon>
          <outerBoundaryIs>
            <LinearRing>
              <tessellate>1</tessellate>
              <coordinates>
                40.1667,55.75,0
                40.3333,55.75,0
                40.3333,55.8333,0
                40.1667,55.8333,0
                40.1667,55.75,0
              </coordinates>
            </LinearRing>
          </outerBoundaryIs>
        </Polygon>
      </Placemark>
      <Placemark>
        <name>Н7</name>
        <description>Квадрат Н7</description>
        <styleUrl>#poly-000000-1000-0</styleUrl>
        <Polygon>
          <outerBoundaryIs>
            <LinearRing>
              <tessellate>1</tessellate>
              <coordinates>
                40.3333,55.75,0
                40.5,55.75,0
                40.5,55.8333,0
                40.3333,55.8333,0
                40.3333,55.75,0
              </coordinates>
            </LinearRing>
          </outerBoundaryIs>
        </Polygon>
      </Placemark>
      <Placemark>
        <name>Н8</name>
        <description>Квадрат Н8</description>
        <styleUrl>#poly-000000-1000-0</styleUrl>
        <Polygon>
          <outerBoundaryIs>
            <LinearRing>
              <tessellate>1</tessellate>
              <coordinates>
                40.5,55.75,0
                40.6667,55.75,0
                40.6667,55.8333,0
                40.5,55.8333,0
                40.5,55.75,0
              </coordinates>
            </LinearRing>
          </outerBoundaryIs>
        </Polygon>
      </Placemark>
      <Placemark>
        <name>Н9</name>
        <description>Квадрат Н9</description>
        <styleUrl>#poly-000000-1000-0</styleUrl>
        <Polygon>
          <outerBoundaryIs>
            <LinearRing>
              <tessellate>1</tessellate>
              <coordinates>
                40.6667,55.75,0
                40.8333,55.75,0
                40.8333,55.8333,0
                40.6667,55.8333,0
                40.6667,55.75,0
              </coordinates>
            </LinearRing>
          </outerBoundaryIs>
        </Polygon>
      </Placemark>
      <Placemark>
        <name>Н10</name>
        <description>Квадрат Н10</description>
        <styleUrl>#poly-000000-1000-0</styleUrl>
        <Polygon>
          <outerBoundaryIs>
            <LinearRing>
              <tessellate>1</tessellate>
              <coordinates>
                40.8333,55.75,0
                41,55.75,0
                41,55.8333,0
                40.8333,55.8333,0
                40.8333,55.75,0
              </coordinates>
            </LinearRing>
          </outerBoundaryIs>
        </Polygon>
      </Placemark>
      <Placemark>
        <name>Н11</name>
        <description>Квадрат Н11</description>
        <styleUrl>#poly-000000-1000-0</styleUrl>
        <Polygon>
          <outerBoundaryIs>
            <LinearRing>
              <tessellate>1</tessellate>
              <coordinates>
                41,55.75,0
                41.1667,55.75,0
                41.1667,55.8333,0
                41,55.8333,0
                41,55.75,0
              </coordinates>
            </LinearRing>
          </outerBoundaryIs>
        </Polygon>
      </Placemark>
      <Placemark>
        <name>Н12</name>
        <description>Квадрат Н12</description>
        <styleUrl>#poly-000000-1000-0</styleUrl>
        <Polygon>
          <outerBoundaryIs>
            <LinearRing>
              <tessellate>1</tessellate>
              <coordinates>
                41.1667,55.75,0
                41.3333,55.75,0
                41.3333,55.8333,0
                41.1667,55.8333,0
                41.1667,55.75,0
              </coordinates>
            </LinearRing>
          </outerBoundaryIs>
        </Polygon>
      </Placemark>
      <Placemark>
        <name>Н13</name>
        <description>Квадрат Н13</description>
        <styleUrl>#poly-000000-1000-0</styleUrl>
        <Polygon>
          <outerBoundaryIs>
            <LinearRing>
              <tessellate>1</tessellate>
              <coordinates>
                41.3333,55.75,0
                41.5,55.75,0
                41.5,55.8333,0
                41.3333,55.8333,0
                41.3333,55.75,0
              </coordinates>
            </LinearRing>
          </outerBoundaryIs>
        </Polygon>
      </Placemark>
      <Placemark>
        <name>Н14</name>
        <description>Квадрат Н14</description>
        <styleUrl>#poly-000000-1000-0</styleUrl>
        <Polygon>
          <outerBoundaryIs>
            <LinearRing>
              <tessellate>1</tessellate>
              <coordinates>
                41.5,55.75,0
                41.6667,55.75,0
                41.6667,55.8333,0
                41.5,55.8333,0
                41.5,55.75,0
              </coordinates>
            </LinearRing>
          </outerBoundaryIs>
        </Polygon>
      </Placemark>
      <Placemark>
        <name>Н15</name>
        <description>Квадрат Н15</description>
        <styleUrl>#poly-000000-1000-0</styleUrl>
        <Polygon>
          <outerBoundaryIs>
            <LinearRing>
              <tessellate>1</tessellate>
              <coordinates>
                41.6667,55.75,0
                41.8333,55.75,0
                41.8333,55.8333,0
                41.6667,55.8333,0
                41.6667,55.75,0
              </coordinates>
            </LinearRing>
          </outerBoundaryIs>
        </Polygon>
      </Placemark>
      <Placemark>
        <name>Н16</name>
        <description>Квадрат Н16</description>
        <styleUrl>#poly-000000-1000-0</styleUrl>
        <Polygon>
          <outerBoundaryIs>
            <LinearRing>
              <tessellate>1</tessellate>
              <coordinates>
                41.8333,55.75,0
                42,55.75,0
                42,55.8333,0
                41.8333,55.8333,0
                41.8333,55.75,0
              </coordinates>
            </LinearRing>
          </outerBoundaryIs>
        </Polygon>
      </Placemark>
      <Placemark>
        <name>Н17</name>
        <description>Квадрат Н17</description>
        <styleUrl>#poly-000000-1000-0</styleUrl>
        <Polygon>
          <outerBoundaryIs>
            <LinearRing>
              <tessellate>1</tessellate>
              <coordinates>
                42,55.75,0
                42.1667,55.75,0
                42.1667,55.8333,0
                42,55.8333,0
                42,55.75,0
              </coordinates>
            </LinearRing>
          </outerBoundaryIs>
        </Polygon>
      </Placemark>
      <Placemark>
        <name>Н18</name>
        <description>Квадрат Н18</description>
        <styleUrl>#poly-000000-1000-0</styleUrl>
        <Polygon>
          <outerBoundaryIs>
            <LinearRing>
              <tessellate>1</tessellate>
              <coordinates>
                42.1667,55.75,0
                42.3333,55.75,0
                42.3333,55.8333,0
                42.1667,55.8333,0
                42.1667,55.75,0
              </coordinates>
            </LinearRing>
          </outerBoundaryIs>
        </Polygon>
      </Placemark>
      <Placemark>
        <name>Н19</name>
        <description>Квадрат Н19</description>
        <styleUrl>#poly-000000-1000-0</styleUrl>
        <Polygon>
          <outerBoundaryIs>
            <LinearRing>
              <tessellate>1</tessellate>
              <coordinates>
                42.3333,55.75,0
                42.5,55.75,0
                42.5,55.8333,0
                42.3333,55.8333,0
                42.3333,55.75,0
              </coordinates>
            </LinearRing>
          </outerBoundaryIs>
        </Polygon>
      </Placemark>
      <Placemark>
        <name>О1</name>
        <description>Квадрат О1</description>
        <styleUrl>#poly-000000-1000-0</styleUrl>
        <Polygon>
          <outerBoundaryIs>
            <LinearRing>
              <tessellate>1</tessellate>
              <coordinates>
                39.8333,55.6667,0
                40,55.6667,0
                40,55.75,0
                39.8333,55.75,0
                39.8333,55.6667,0
              </coordinates>
            </LinearRing>
          </outerBoundaryIs>
        </Polygon>
      </Placemark>
      <Placemark>
        <name>О2</name>
        <description>Квадрат О2</description>
        <styleUrl>#poly-000000-1000-0</styleUrl>
        <Polygon>
          <outerBoundaryIs>
            <LinearRing>
              <tessellate>1</tessellate>
              <coordinates>
                40,55.6667,0
                40.1667,55.6667,0
                40.1667,55.75,0
                40,55.75,0
                40,55.6667,0
              </coordinates>
            </LinearRing>
          </outerBoundaryIs>
        </Polygon>
      </Placemark>
      <Placemark>
        <name>О3</name>
        <description>Квадрат О3</description>
        <styleUrl>#poly-000000-1000-0</styleUrl>
        <Polygon>
          <outerBoundaryIs>
            <LinearRing>
              <tessellate>1</tessellate>
              <coordinates>
                40.1667,55.6667,0
                40.3333,55.6667,0
                40.3333,55.75,0
                40.1667,55.75,0
                40.1667,55.6667,0
              </coordinates>
            </LinearRing>
          </outerBoundaryIs>
        </Polygon>
      </Placemark>
      <Placemark>
        <name>О4</name>
        <description>Квадрат О4</description>
        <styleUrl>#poly-000000-1000-0</styleUrl>
        <Polygon>
          <outerBoundaryIs>
            <LinearRing>
              <tessellate>1</tessellate>
              <coordinates>
                40.3333,55.6667,0
                40.5,55.6667,0
                40.5,55.75,0
                40.3333,55.75,0
                40.3333,55.6667,0
              </coordinates>
            </LinearRing>
          </outerBoundaryIs>
        </Polygon>
      </Placemark>
      <Placemark>
        <name>О5</name>
        <description>Квадрат О5</description>
        <styleUrl>#poly-000000-1000-0</styleUrl>
        <Polygon>
          <outerBoundaryIs>
            <LinearRing>
              <tessellate>1</tessellate>
              <coordinates>
                40.5,55.6667,0
                40.6667,55.6667,0
                40.6667,55.75,0
                40.5,55.75,0
                40.5,55.6667,0
              </coordinates>
            </LinearRing>
          </outerBoundaryIs>
        </Polygon>
      </Placemark>
      <Placemark>
        <name>О6</name>
        <description>Квадрат О6</description>
        <styleUrl>#poly-000000-1000-0</styleUrl>
        <Polygon>
          <outerBoundaryIs>
            <LinearRing>
              <tessellate>1</tessellate>
              <coordinates>
                40.6667,55.6667,0
                40.8333,55.6667,0
                40.8333,55.75,0
                40.6667,55.75,0
                40.6667,55.6667,0
              </coordinates>
            </LinearRing>
          </outerBoundaryIs>
        </Polygon>
      </Placemark>
      <Placemark>
        <name>О7</name>
        <description>Квадрат О7</description>
        <styleUrl>#poly-000000-1000-0</styleUrl>
        <Polygon>
          <outerBoundaryIs>
            <LinearRing>
              <tessellate>1</tessellate>
              <coordinates>
                40.8333,55.6667,0
                41,55.6667,0
                41,55.75,0
                40.8333,55.75,0
                40.8333,55.6667,0
              </coordinates>
            </LinearRing>
          </outerBoundaryIs>
        </Polygon>
      </Placemark>
      <Placemark>
        <name>О8</name>
        <description>Квадрат О8</description>
        <styleUrl>#poly-000000-1000-0</styleUrl>
        <Polygon>
          <outerBoundaryIs>
            <LinearRing>
              <tessellate>1</tessellate>
              <coordinates>
                41,55.6667,0
                41.1667,55.6667,0
                41.1667,55.75,0
                41,55.75,0
                41,55.6667,0
              </coordinates>
            </LinearRing>
          </outerBoundaryIs>
        </Polygon>
      </Placemark>
      <Placemark>
        <name>О9</name>
        <description>Квадрат О9</description>
        <styleUrl>#poly-000000-1000-0</styleUrl>
        <Polygon>
          <outerBoundaryIs>
            <LinearRing>
              <tessellate>1</tessellate>
              <coordinates>
                41.1667,55.6667,0
                41.3333,55.6667,0
                41.3333,55.75,0
                41.1667,55.75,0
                41.1667,55.6667,0
              </coordinates>
            </LinearRing>
          </outerBoundaryIs>
        </Polygon>
      </Placemark>
      <Placemark>
        <name>О10</name>
        <description>Квадрат О10</description>
        <styleUrl>#poly-000000-1000-0</styleUrl>
        <Polygon>
          <outerBoundaryIs>
            <LinearRing>
              <tessellate>1</tessellate>
              <coordinates>
                41.3333,55.6667,0
                41.5,55.6667,0
                41.5,55.75,0
                41.3333,55.75,0
                41.3333,55.6667,0
              </coordinates>
            </LinearRing>
          </outerBoundaryIs>
        </Polygon>
      </Placemark>
      <Placemark>
        <name>О11</name>
        <description>Квадрат О11</description>
        <styleUrl>#poly-000000-1000-0</styleUrl>
        <Polygon>
          <outerBoundaryIs>
            <LinearRing>
              <tessellate>1</tessellate>
              <coordinates>
                41.5,55.6667,0
                41.6667,55.6667,0
                41.6667,55.75,0
                41.5,55.75,0
                41.5,55.6667,0
              </coordinates>
            </LinearRing>
          </outerBoundaryIs>
        </Polygon>
      </Placemark>
      <Placemark>
        <name>О12</name>
        <description>Квадрат О12</description>
        <styleUrl>#poly-000000-1000-0</styleUrl>
        <Polygon>
          <outerBoundaryIs>
            <LinearRing>
              <tessellate>1</tessellate>
              <coordinates>
                41.6667,55.6667,0
                41.8333,55.6667,0
                41.8333,55.75,0
                41.6667,55.75,0
                41.6667,55.6667,0
              </coordinates>
            </LinearRing>
          </outerBoundaryIs>
        </Polygon>
      </Placemark>
      <Placemark>
        <name>О13</name>
        <description>Квадрат О13</description>
        <styleUrl>#poly-000000-1000-0</styleUrl>
        <Polygon>
          <outerBoundaryIs>
            <LinearRing>
              <tessellate>1</tessellate>
              <coordinates>
                41.8333,55.6667,0
                42,55.6667,0
                42,55.75,0
                41.8333,55.75,0
                41.8333,55.6667,0
              </coordinates>
            </LinearRing>
          </outerBoundaryIs>
        </Polygon>
      </Placemark>
      <Placemark>
        <name>О14</name>
        <description>Квадрат О14</description>
        <styleUrl>#poly-000000-1000-0</styleUrl>
        <Polygon>
          <outerBoundaryIs>
            <LinearRing>
              <tessellate>1</tessellate>
              <coordinates>
                42,55.6667,0
                42.1667,55.6667,0
                42.1667,55.75,0
                42,55.75,0
                42,55.6667,0
              </coordinates>
            </LinearRing>
          </outerBoundaryIs>
        </Polygon>
      </Placemark>
      <Placemark>
        <name>О15</name>
        <description>Квадрат О15</description>
        <styleUrl>#poly-000000-1000-0</styleUrl>
        <Polygon>
          <outerBoundaryIs>
            <LinearRing>
              <tessellate>1</tessellate>
              <coordinates>
                42.1667,55.6667,0
                42.3333,55.6667,0
                42.3333,55.75,0
                42.1667,55.75,0
                42.1667,55.6667,0
              </coordinates>
            </LinearRing>
          </outerBoundaryIs>
        </Polygon>
      </Placemark>
      <Placemark>
        <name>П1</name>
        <description>Квадрат П1</description>
        <styleUrl>#poly-000000-1000-0</styleUrl>
        <Polygon>
          <outerBoundaryIs>
            <LinearRing>
              <tessellate>1</tessellate>
              <coordinates>
                40,55.5833,0
                40.1667,55.5833,0
                40.1667,55.6667,0
                40,55.6667,0
                40,55.5833,0
              </coordinates>
            </LinearRing>
          </outerBoundaryIs>
        </Polygon>
      </Placemark>
      <Placemark>
        <name>П2</name>
        <description>Квадрат П2</description>
        <styleUrl>#poly-000000-1000-0</styleUrl>
        <Polygon>
          <outerBoundaryIs>
            <LinearRing>
              <tessellate>1</tessellate>
              <coordinates>
                40.1667,55.5833,0
                40.3333,55.5833,0
                40.3333,55.6667,0
                40.1667,55.6667,0
                40.1667,55.5833,0
              </coordinates>
            </LinearRing>
          </outerBoundaryIs>
        </Polygon>
      </Placemark>
      <Placemark>
        <name>П3</name>
        <description>Квадрат П3</description>
        <styleUrl>#poly-000000-1000-0</styleUrl>
        <Polygon>
          <outerBoundaryIs>
            <LinearRing>
              <tessellate>1</tessellate>
              <coordinates>
                40.3333,55.5833,0
                40.5,55.5833,0
                40.5,55.6667,0
                40.3333,55.6667,0
                40.3333,55.5833,0
              </coordinates>
            </LinearRing>
          </outerBoundaryIs>
        </Polygon>
      </Placemark>
      <Placemark>
        <name>П4</name>
        <description>Квадрат П4</description>
        <styleUrl>#poly-000000-1000-0</styleUrl>
        <Polygon>
          <outerBoundaryIs>
            <LinearRing>
              <tessellate>1</tessellate>
              <coordinates>
                40.5,55.5833,0
                40.6667,55.5833,0
                40.6667,55.6667,0
                40.5,55.6667,0
                40.5,55.5833,0
              </coordinates>
            </LinearRing>
          </outerBoundaryIs>
        </Polygon>
      </Placemark>
      <Placemark>
        <name>П5</name>
        <description>Квадрат П5</description>
        <styleUrl>#poly-000000-1000-0</styleUrl>
        <Polygon>
          <outerBoundaryIs>
            <LinearRing>
              <tessellate>1</tessellate>
              <coordinates>
                40.6667,55.5833,0
                40.8333,55.5833,0
                40.8333,55.6667,0
                40.6667,55.6667,0
                40.6667,55.5833,0
              </coordinates>
            </LinearRing>
          </outerBoundaryIs>
        </Polygon>
      </Placemark>
      <Placemark>
        <name>П6</name>
        <description>Квадрат П6</description>
        <styleUrl>#poly-000000-1000-0</styleUrl>
        <Polygon>
          <outerBoundaryIs>
            <LinearRing>
              <tessellate>1</tessellate>
              <coordinates>
                40.8333,55.5833,0
                41,55.5833,0
                41,55.6667,0
                40.8333,55.6667,0
                40.8333,55.5833,0
              </coordinates>
            </LinearRing>
          </outerBoundaryIs>
        </Polygon>
      </Placemark>
      <Placemark>
        <name>П7</name>
        <description>Квадрат П7</description>
        <styleUrl>#poly-000000-1000-0</styleUrl>
        <Polygon>
          <outerBoundaryIs>
            <LinearRing>
              <tessellate>1</tessellate>
              <coordinates>
                41,55.5833,0
                41.1667,55.5833,0
                41.1667,55.6667,0
                41,55.6667,0
                41,55.5833,0
              </coordinates>
            </LinearRing>
          </outerBoundaryIs>
        </Polygon>
      </Placemark>
      <Placemark>
        <name>П8</name>
        <description>Квадрат П8</description>
        <styleUrl>#poly-000000-1000-0</styleUrl>
        <Polygon>
          <outerBoundaryIs>
            <LinearRing>
              <tessellate>1</tessellate>
              <coordinates>
                41.1667,55.5833,0
                41.3333,55.5833,0
                41.3333,55.6667,0
                41.1667,55.6667,0
                41.1667,55.5833,0
              </coordinates>
            </LinearRing>
          </outerBoundaryIs>
        </Polygon>
      </Placemark>
      <Placemark>
        <name>П9</name>
        <description>Квадрат П9</description>
        <styleUrl>#poly-000000-1000-0</styleUrl>
        <Polygon>
          <outerBoundaryIs>
            <LinearRing>
              <tessellate>1</tessellate>
              <coordinates>
                41.3333,55.5833,0
                41.5,55.5833,0
                41.5,55.6667,0
                41.3333,55.6667,0
                41.3333,55.5833,0
              </coordinates>
            </LinearRing>
          </outerBoundaryIs>
        </Polygon>
      </Placemark>
      <Placemark>
        <name>П10</name>
        <description>Квадрат П10</description>
        <styleUrl>#poly-000000-1000-0</styleUrl>
        <Polygon>
          <outerBoundaryIs>
            <LinearRing>
              <tessellate>1</tessellate>
              <coordinates>
                41.5,55.5833,0
                41.6667,55.5833,0
                41.6667,55.6667,0
                41.5,55.6667,0
                41.5,55.5833,0
              </coordinates>
            </LinearRing>
          </outerBoundaryIs>
        </Polygon>
      </Placemark>
      <Placemark>
        <name>П11</name>
        <description>Квадрат П11</description>
        <styleUrl>#poly-000000-1000-0</styleUrl>
        <Polygon>
          <outerBoundaryIs>
            <LinearRing>
              <tessellate>1</tessellate>
              <coordinates>
                41.6667,55.5833,0
                41.8333,55.5833,0
                41.8333,55.6667,0
                41.6667,55.6667,0
                41.6667,55.5833,0
              </coordinates>
            </LinearRing>
          </outerBoundaryIs>
        </Polygon>
      </Placemark>
      <Placemark>
        <name>П12</name>
        <description>Квадрат П12</description>
        <styleUrl>#poly-000000-1000-0</styleUrl>
        <Polygon>
          <outerBoundaryIs>
            <LinearRing>
              <tessellate>1</tessellate>
              <coordinates>
                41.8333,55.5833,0
                42,55.5833,0
                42,55.6667,0
                41.8333,55.6667,0
                41.8333,55.5833,0
              </coordinates>
            </LinearRing>
          </outerBoundaryIs>
        </Polygon>
      </Placemark>
      <Placemark>
        <name>П13</name>
        <description>Квадрат П13</description>
        <styleUrl>#poly-000000-1000-0</styleUrl>
        <Polygon>
          <outerBoundaryIs>
            <LinearRing>
              <tessellate>1</tessellate>
              <coordinates>
                42,55.5833,0
                42.1667,55.5833,0
                42.1667,55.6667,0
                42,55.6667,0
                42,55.5833,0
              </coordinates>
            </LinearRing>
          </outerBoundaryIs>
        </Polygon>
      </Placemark>
      <Placemark>
        <name>Р1</name>
        <description>Квадрат Р1</description>
        <styleUrl>#poly-000000-1000-0</styleUrl>
        <Polygon>
          <outerBoundaryIs>
            <LinearRing>
              <tessellate>1</tessellate>
              <coordinates>
                40,55.5,0
                40.1667,55.5,0
                40.1667,55.5833,0
                40,55.5833,0
                40,55.5,0
              </coordinates>
            </LinearRing>
          </outerBoundaryIs>
        </Polygon>
      </Placemark>
      <Placemark>
        <name>Р2</name>
        <description>Квадрат Р2</description>
        <styleUrl>#poly-000000-1000-0</styleUrl>
        <Polygon>
          <outerBoundaryIs>
            <LinearRing>
              <tessellate>1</tessellate>
              <coordinates>
                40.1667,55.5,0
                40.3333,55.5,0
                40.3333,55.5833,0
                40.1667,55.5833,0
                40.1667,55.5,0
              </coordinates>
            </LinearRing>
          </outerBoundaryIs>
        </Polygon>
      </Placemark>
      <Placemark>
        <name>Р3</name>
        <description>Квадрат Р3</description>
        <styleUrl>#poly-000000-1000-0</styleUrl>
        <Polygon>
          <outerBoundaryIs>
            <LinearRing>
              <tessellate>1</tessellate>
              <coordinates>
                40.3333,55.5,0
                40.5,55.5,0
                40.5,55.5833,0
                40.3333,55.5833,0
                40.3333,55.5,0
              </coordinates>
            </LinearRing>
          </outerBoundaryIs>
        </Polygon>
      </Placemark>
      <Placemark>
        <name>Р4</name>
        <description>Квадрат Р4</description>
        <styleUrl>#poly-000000-1000-0</styleUrl>
        <Polygon>
          <outerBoundaryIs>
            <LinearRing>
              <tessellate>1</tessellate>
              <coordinates>
                40.5,55.5,0
                40.6667,55.5,0
                40.6667,55.5833,0
                40.5,55.5833,0
                40.5,55.5,0
              </coordinates>
            </LinearRing>
          </outerBoundaryIs>
        </Polygon>
      </Placemark>
      <Placemark>
        <name>Р5</name>
        <description>Квадрат Р5</description>
        <styleUrl>#poly-000000-1000-0</styleUrl>
        <Polygon>
          <outerBoundaryIs>
            <LinearRing>
              <tessellate>1</tessellate>
              <coordinates>
                40.6667,55.5,0
                40.8333,55.5,0
                40.8333,55.5833,0
                40.6667,55.5833,0
                40.6667,55.5,0
              </coordinates>
            </LinearRing>
          </outerBoundaryIs>
        </Polygon>
      </Placemark>
      <Placemark>
        <name>Р6</name>
        <description>Квадрат Р6</description>
        <styleUrl>#poly-000000-1000-0</styleUrl>
        <Polygon>
          <outerBoundaryIs>
            <LinearRing>
              <tessellate>1</tessellate>
              <coordinates>
                40.8333,55.5,0
                41,55.5,0
                41,55.5833,0
                40.8333,55.5833,0
                40.8333,55.5,0
              </coordinates>
            </LinearRing>
          </outerBoundaryIs>
        </Polygon>
      </Placemark>
      <Placemark>
        <name>Р7</name>
        <description>Квадрат Р7</description>
        <styleUrl>#poly-000000-1000-0</styleUrl>
        <Polygon>
          <outerBoundaryIs>
            <LinearRing>
              <tessellate>1</tessellate>
              <coordinates>
                41,55.5,0
                41.1667,55.5,0
                41.1667,55.5833,0
                41,55.5833,0
                41,55.5,0
              </coordinates>
            </LinearRing>
          </outerBoundaryIs>
        </Polygon>
      </Placemark>
      <Placemark>
        <name>Р8</name>
        <description>Квадрат Р8</description>
        <styleUrl>#poly-000000-1000-0</styleUrl>
        <Polygon>
          <outerBoundaryIs>
            <LinearRing>
              <tessellate>1</tessellate>
              <coordinates>
                41.1667,55.5,0
                41.3333,55.5,0
                41.3333,55.5833,0
                41.1667,55.5833,0
                41.1667,55.5,0
              </coordinates>
            </LinearRing>
          </outerBoundaryIs>
        </Polygon>
      </Placemark>
      <Placemark>
        <name>Р9</name>
        <description>Квадрат Р9</description>
        <styleUrl>#poly-000000-1000-0</styleUrl>
        <Polygon>
          <outerBoundaryIs>
            <LinearRing>
              <tessellate>1</tessellate>
              <coordinates>
                41.3333,55.5,0
                41.5,55.5,0
                41.5,55.5833,0
                41.3333,55.5833,0
                41.3333,55.5,0
              </coordinates>
            </LinearRing>
          </outerBoundaryIs>
        </Polygon>
      </Placemark>
      <Placemark>
        <name>Р10</name>
        <description>Квадрат Р10</description>
        <styleUrl>#poly-000000-1000-0</styleUrl>
        <Polygon>
          <outerBoundaryIs>
            <LinearRing>
              <tessellate>1</tessellate>
              <coordinates>
                41.5,55.5,0
                41.6667,55.5,0
                41.6667,55.5833,0
                41.5,55.5833,0
                41.5,55.5,0
              </coordinates>
            </LinearRing>
          </outerBoundaryIs>
        </Polygon>
      </Placemark>
      <Placemark>
        <name>Р11</name>
        <description>Квадрат Р11</description>
        <styleUrl>#poly-000000-1000-0</styleUrl>
        <Polygon>
          <outerBoundaryIs>
            <LinearRing>
              <tessellate>1</tessellate>
              <coordinates>
                41.6667,55.5,0
                41.8333,55.5,0
                41.8333,55.5833,0
                41.6667,55.5833,0
                41.6667,55.5,0
              </coordinates>
            </LinearRing>
          </outerBoundaryIs>
        </Polygon>
      </Placemark>
      <Placemark>
        <name>Р12</name>
        <description>Квадрат Р12</description>
        <styleUrl>#poly-000000-1000-0</styleUrl>
        <Polygon>
          <outerBoundaryIs>
            <LinearRing>
              <tessellate>1</tessellate>
              <coordinates>
                41.8333,55.5,0
                42,55.5,0
                42,55.5833,0
                41.8333,55.5833,0
                41.8333,55.5,0
              </coordinates>
            </LinearRing>
          </outerBoundaryIs>
        </Polygon>
      </Placemark>
      <Placemark>
        <name>Р13</name>
        <description>Квадрат Р13</description>
        <styleUrl>#poly-000000-1000-0</styleUrl>
        <Polygon>
          <outerBoundaryIs>
            <LinearRing>
              <tessellate>1</tessellate>
              <coordinates>
                42,55.5,0
                42.1667,55.5,0
                42.1667,55.5833,0
                42,55.5833,0
                42,55.5,0
              </coordinates>
            </LinearRing>
          </outerBoundaryIs>
        </Polygon>
      </Placemark>
      <Placemark>
        <name>С0</name>
        <description>Квадрат С0 (дополнительный)</description>
        <styleUrl>#poly-000000-1000-0</styleUrl>
        <Polygon>
          <outerBoundaryIs>
            <LinearRing>
              <tessellate>1</tessellate>
              <coordinates>
                40,55.4167,0
                40.1667,55.4167,0
                40.1667,55.5,0
                40,55.5,0
                40,55.4167,0
              </coordinates>
            </LinearRing>
          </outerBoundaryIs>
        </Polygon>
      </Placemark>
      <Placemark>
        <name>С1</name>
        <description>Квадрат С1</description>
        <styleUrl>#poly-000000-1000-0</styleUrl>
        <Polygon>
          <outerBoundaryIs>
            <LinearRing>
              <tessellate>1</tessellate>
              <coordinates>
                40.1667,55.4167,0
                40.3333,55.4167,0
                40.3333,55.5,0
                40.1667,55.5,0
                40.1667,55.4167,0
              </coordinates>
            </LinearRing>
          </outerBoundaryIs>
        </Polygon>
      </Placemark>
      <Placemark>
        <name>С2</name>
        <description>Квадрат С2</description>
        <styleUrl>#poly-000000-1000-0</styleUrl>
        <Polygon>
          <outerBoundaryIs>
            <LinearRing>
              <tessellate>1</tessellate>
              <coordinates>
                40.3333,55.4167,0
                40.5,55.4167,0
                40.5,55.5,0
                40.3333,55.5,0
                40.3333,55.4167,0
              </coordinates>
            </LinearRing>
          </outerBoundaryIs>
        </Polygon>
      </Placemark>
      <Placemark>
        <name>С3</name>
        <description>Квадрат С3</description>
        <styleUrl>#poly-000000-1000-0</styleUrl>
        <Polygon>
          <outerBoundaryIs>
            <LinearRing>
              <tessellate>1</tessellate>
              <coordinates>
                40.5,55.4167,0
                40.6667,55.4167,0
                40.6667,55.5,0
                40.5,55.5,0
                40.5,55.4167,0
              </coordinates>
            </LinearRing>
          </outerBoundaryIs>
        </Polygon>
      </Placemark>
      <Placemark>
        <name>С4</name>
        <description>Квадрат С4</description>
        <styleUrl>#poly-000000-1000-0</styleUrl>
        <Polygon>
          <outerBoundaryIs>
            <LinearRing>
              <tessellate>1</tessellate>
              <coordinates>
                40.6667,55.4167,0
                40.8333,55.4167,0
                40.8333,55.5,0
                40.6667,55.5,0
                40.6667,55.4167,0
              </coordinates>
            </LinearRing>
          </outerBoundaryIs>
        </Polygon>
      </Placemark>
      <Placemark>
        <name>С5</name>
        <description>Квадрат С5</description>
        <styleUrl>#poly-000000-1000-0</styleUrl>
        <Polygon>
          <outerBoundaryIs>
            <LinearRing>
              <tessellate>1</tessellate>
              <coordinates>
                40.8333,55.4167,0
                41,55.4167,0
                41,55.5,0
                40.8333,55.5,0
                40.8333,55.4167,0
              </coordinates>
            </LinearRing>
          </outerBoundaryIs>
        </Polygon>
      </Placemark>
      <Placemark>
        <name>С6</name>
        <description>Квадрат С6</description>
        <styleUrl>#poly-000000-1000-0</styleUrl>
        <Polygon>
          <outerBoundaryIs>
            <LinearRing>
              <tessellate>1</tessellate>
              <coordinates>
                41,55.4167,0
                41.1667,55.4167,0
                41.1667,55.5,0
                41,55.5,0
                41,55.4167,0
              </coordinates>
            </LinearRing>
          </outerBoundaryIs>
        </Polygon>
      </Placemark>
      <Placemark>
        <name>С7</name>
        <description>Квадрат С7</description>
        <styleUrl>#poly-000000-1000-0</styleUrl>
        <Polygon>
          <outerBoundaryIs>
            <LinearRing>
              <tessellate>1</tessellate>
              <coordinates>
                41.1667,55.4167,0
                41.3333,55.4167,0
                41.3333,55.5,0
                41.1667,55.5,0
                41.1667,55.4167,0
              </coordinates>
            </LinearRing>
          </outerBoundaryIs>
        </Polygon>
      </Placemark>
      <Placemark>
        <name>С8</name>
        <description>Квадрат С8</description>
        <styleUrl>#poly-000000-1000-0</styleUrl>
        <Polygon>
          <outerBoundaryIs>
            <LinearRing>
              <tessellate>1</tessellate>
              <coordinates>
                41.3333,55.4167,0
                41.5,55.4167,0
                41.5,55.5,0
                41.3333,55.5,0
                41.3333,55.4167,0
              </coordinates>
            </LinearRing>
          </outerBoundaryIs>
        </Polygon>
      </Placemark>
      <Placemark>
        <name>С9</name>
        <description>Квадрат С9</description>
        <styleUrl>#poly-000000-1000-0</styleUrl>
        <Polygon>
          <outerBoundaryIs>
            <LinearRing>
              <tessellate>1</tessellate>
              <coordinates>
                41.5,55.4167,0
                41.6667,55.4167,0
                41.6667,55.5,0
                41.5,55.5,0
                41.5,55.4167,0
              </coordinates>
            </LinearRing>
          </outerBoundaryIs>
        </Polygon>
      </Placemark>
      <Placemark>
        <name>С10</name>
        <description>Квадрат С10</description>
        <styleUrl>#poly-000000-1000-0</styleUrl>
        <Polygon>
          <outerBoundaryIs>
            <LinearRing>
              <tessellate>1</tessellate>
              <coordinates>
                41.6667,55.4167,0
                41.8333,55.4167,0
                41.8333,55.5,0
                41.6667,55.5,0
                41.6667,55.4167,0
              </coordinates>
            </LinearRing>
          </outerBoundaryIs>
        </Polygon>
      </Placemark>
      <Placemark>
        <name>С11</name>
        <description>Квадрат С11</description>
        <styleUrl>#poly-000000-1000-0</styleUrl>
        <Polygon>
          <outerBoundaryIs>
            <LinearRing>
              <tessellate>1</tessellate>
              <coordinates>
                41.8333,55.4167,0
                42,55.4167,0
                42,55.5,0
                41.8333,55.5,0
                41.8333,55.4167,0
              </coordinates>
            </LinearRing>
          </outerBoundaryIs>
        </Polygon>
      </Placemark>
      <Placemark>
        <name>С12</name>
        <description>Квадрат С12</description>
        <styleUrl>#poly-000000-1000-0</styleUrl>
        <Polygon>
          <outerBoundaryIs>
            <LinearRing>
              <tessellate>1</tessellate>
              <coordinates>
                42,55.4167,0
                42.1667,55.4167,0
                42.1667,55.5,0
                42,55.5,0
                42,55.4167,0
              </coordinates>
            </LinearRing>
          </outerBoundaryIs>
        </Polygon>
      </Placemark>
      <Placemark>
        <name>Т1</name>
        <description>Квадрат Т1</description>
        <styleUrl>#poly-000000-1000-0</styleUrl>
        <Polygon>
          <outerBoundaryIs>
            <LinearRing>
              <tessellate>1</tessellate>
              <coordinates>
                40.1667,55.3333,0
                40.3333,55.3333,0
                40.3333,55.4167,0
                40.1667,55.4167,0
                40.1667,55.3333,0
              </coordinates>
            </LinearRing>
          </outerBoundaryIs>
        </Polygon>
      </Placemark>
      <Placemark>
        <name>Т2</name>
        <description>Квадрат Т2</description>
        <styleUrl>#poly-000000-1000-0</styleUrl>
        <Polygon>
          <outerBoundaryIs>
            <LinearRing>
              <tessellate>1</tessellate>
              <coordinates>
                40.3333,55.3333,0
                40.5,55.3333,0
                40.5,55.4167,0
                40.3333,55.4167,0
                40.3333,55.3333,0
              </coordinates>
            </LinearRing>
          </outerBoundaryIs>
        </Polygon>
      </Placemark>
      <Placemark>
        <name>Т3</name>
        <description>Квадрат Т3</description>
        <styleUrl>#poly-000000-1000-0</styleUrl>
        <Polygon>
          <outerBoundaryIs>
            <LinearRing>
              <tessellate>1</tessellate>
              <coordinates>
                40.5,55.3333,0
                40.6667,55.3333,0
                40.6667,55.4167,0
                40.5,55.4167,0
                40.5,55.3333,0
              </coordinates>
            </LinearRing>
          </outerBoundaryIs>
        </Polygon>
      </Placemark>
      <Placemark>
        <name>Т4</name>
        <description>Квадрат Т4</description>
        <styleUrl>#poly-000000-1000-0</styleUrl>
        <Polygon>
          <outerBoundaryIs>
            <LinearRing>
              <tessellate>1</tessellate>
              <coordinates>
                40.6667,55.3333,0
                40.8333,55.3333,0
                40.8333,55.4167,0
                40.6667,55.4167,0
                40.6667,55.3333,0
              </coordinates>
            </LinearRing>
          </outerBoundaryIs>
        </Polygon>
      </Placemark>
      <Placemark>
        <name>Т5</name>
        <description>Квадрат Т5</description>
        <styleUrl>#poly-000000-1000-0</styleUrl>
        <Polygon>
          <outerBoundaryIs>
            <LinearRing>
              <tessellate>1</tessellate>
              <coordinates>
                40.8333,55.3333,0
                41,55.3333,0
                41,55.4167,0
                40.8333,55.4167,0
                40.8333,55.3333,0
              </coordinates>
            </LinearRing>
          </outerBoundaryIs>
        </Polygon>
      </Placemark>
      <Placemark>
        <name>Т6</name>
        <description>Квадрат Т6</description>
        <styleUrl>#poly-000000-1000-0</styleUrl>
        <Polygon>
          <outerBoundaryIs>
            <LinearRing>
              <tessellate>1</tessellate>
              <coordinates>
                41,55.3333,0
                41.1667,55.3333,0
                41.1667,55.4167,0
                41,55.4167,0
                41,55.3333,0
              </coordinates>
            </LinearRing>
          </outerBoundaryIs>
        </Polygon>
      </Placemark>
      <Placemark>
        <name>Т7</name>
        <description>Квадрат Т7</description>
        <styleUrl>#poly-000000-1000-0</styleUrl>
        <Polygon>
          <outerBoundaryIs>
            <LinearRing>
              <tessellate>1</tessellate>
              <coordinates>
                41.1667,55.3333,0
                41.3333,55.3333,0
                41.3333,55.4167,0
                41.1667,55.4167,0
                41.1667,55.3333,0
              </coordinates>
            </LinearRing>
          </outerBoundaryIs>
        </Polygon>
      </Placemark>
      <Placemark>
        <name>Т8</name>
        <description>Квадрат Т8</description>
        <styleUrl>#poly-000000-1000-0</styleUrl>
        <Polygon>
          <outerBoundaryIs>
            <LinearRing>
              <tessellate>1</tessellate>
              <coordinates>
                41.3333,55.3333,0
                41.5,55.3333,0
                41.5,55.4167,0
                41.3333,55.4167,0
                41.3333,55.3333,0
              </coordinates>
            </LinearRing>
          </outerBoundaryIs>
        </Polygon>
      </Placemark>
      <Placemark>
        <name>Т9</name>
        <description>Квадрат Т9</description>
        <styleUrl>#poly-000000-1000-0</styleUrl>
        <Polygon>
          <outerBoundaryIs>
            <LinearRing>
              <tessellate>1</tessellate>
              <coordinates>
                41.5,55.3333,0
                41.6667,55.3333,0
                41.6667,55.4167,0
                41.5,55.4167,0
                41.5,55.3333,0
              </coordinates>
            </LinearRing>
          </outerBoundaryIs>
        </Polygon>
      </Placemark>
      <Placemark>
        <name>Т10</name>
        <description>Квадрат Т10</description>
        <styleUrl>#poly-000000-1000-0</styleUrl>
        <Polygon>
          <outerBoundaryIs>
            <LinearRing>
              <tessellate>1</tessellate>
              <coordinates>
                41.6667,55.3333,0
                41.8333,55.3333,0
                41.8333,55.4167,0
                41.6667,55.4167,0
                41.6667,55.3333,0
              </coordinates>
            </LinearRing>
          </outerBoundaryIs>
        </Polygon>
      </Placemark>
      <Placemark>
        <name>Т11</name>
        <description>Квадрат Т11</description>
        <styleUrl>#poly-000000-1000-0</styleUrl>
        <Polygon>
          <outerBoundaryIs>
            <LinearRing>
              <tessellate>1</tessellate>
              <coordinates>
                41.8333,55.3333,0
                42,55.3333,0
                42,55.4167,0
                41.8333,55.4167,0
                41.8333,55.3333,0
              </coordinates>
            </LinearRing>
          </outerBoundaryIs>
        </Polygon>
      </Placemark>
      <Placemark>
        <name>Т12</name>
        <description>Квадрат Т12</description>
        <styleUrl>#poly-000000-1000-0</styleUrl>
        <Polygon>
          <outerBoundaryIs>
            <LinearRing>
              <tessellate>1</tessellate>
              <coordinates>
                42,55.3333,0
                42.1667,55.3333,0
                42.1667,55.4167,0
                42,55.4167,0
                42,55.3333,0
              </coordinates>
            </LinearRing>
          </outerBoundaryIs>
        </Polygon>
      </Placemark>
      <Placemark>
        <name>У1</name>
        <description>Квадрат У1</description>
        <styleUrl>#poly-000000-1000-0</styleUrl>
        <Polygon>
          <outerBoundaryIs>
            <LinearRing>
              <tessellate>1</tessellate>
              <coordinates>
                40.3333,55.25,0
                40.5,55.25,0
                40.5,55.3333,0
                40.3333,55.3333,0
                40.3333,55.25,0
              </coordinates>
            </LinearRing>
          </outerBoundaryIs>
        </Polygon>
      </Placemark>
      <Placemark>
        <name>У2</name>
        <description>Квадрат У2</description>
        <styleUrl>#poly-000000-1000-0</styleUrl>
        <Polygon>
          <outerBoundaryIs>
            <LinearRing>
              <tessellate>1</tessellate>
              <coordinates>
                40.5,55.25,0
                40.6667,55.25,0
                40.6667,55.3333,0
                40.5,55.3333,0
                40.5,55.25,0
              </coordinates>
            </LinearRing>
          </outerBoundaryIs>
        </Polygon>
      </Placemark>
      <Placemark>
        <name>У3</name>
        <description>Квадрат У3</description>
        <styleUrl>#poly-000000-1000-0</styleUrl>
        <Polygon>
          <outerBoundaryIs>
            <LinearRing>
              <tessellate>1</tessellate>
              <coordinates>
                40.6667,55.25,0
                40.8333,55.25,0
                40.8333,55.3333,0
                40.6667,55.3333,0
                40.6667,55.25,0
              </coordinates>
            </LinearRing>
          </outerBoundaryIs>
        </Polygon>
      </Placemark>
      <Placemark>
        <name>У4</name>
        <description>Квадрат У4</description>
        <styleUrl>#poly-000000-1000-0</styleUrl>
        <Polygon>
          <outerBoundaryIs>
            <LinearRing>
              <tessellate>1</tessellate>
              <coordinates>
                40.8333,55.25,0
                41,55.25,0
                41,55.3333,0
                40.8333,55.3333,0
                40.8333,55.25,0
              </coordinates>
            </LinearRing>
          </outerBoundaryIs>
        </Polygon>
      </Placemark>
      <Placemark>
        <name>У5</name>
        <description>Квадрат У5</description>
        <styleUrl>#poly-000000-1000-0</styleUrl>
        <Polygon>
          <outerBoundaryIs>
            <LinearRing>
              <tessellate>1</tessellate>
              <coordinates>
                41,55.25,0
                41.1667,55.25,0
                41.1667,55.3333,0
                41,55.3333,0
                41,55.25,0
              </coordinates>
            </LinearRing>
          </outerBoundaryIs>
        </Polygon>
      </Placemark>
      <Placemark>
        <name>У6</name>
        <description>Квадрат У6</description>
        <styleUrl>#poly-000000-1000-0</styleUrl>
        <Polygon>
          <outerBoundaryIs>
            <LinearRing>
              <tessellate>1</tessellate>
              <coordinates>
                41.1667,55.25,0
                41.3333,55.25,0
                41.3333,55.3333,0
                41.1667,55.3333,0
                41.1667,55.25,0
              </coordinates>
            </LinearRing>
          </outerBoundaryIs>
        </Polygon>
      </Placemark>
      <Placemark>
        <name>У7</name>
        <description>Квадрат У7</description>
        <styleUrl>#poly-000000-1000-0</styleUrl>
        <Polygon>
          <outerBoundaryIs>
            <LinearRing>
              <tessellate>1</tessellate>
              <coordinates>
                41.3333,55.25,0
                41.5,55.25,0
                41.5,55.3333,0
                41.3333,55.3333,0
                41.3333,55.25,0
              </coordinates>
            </LinearRing>
          </outerBoundaryIs>
        </Polygon>
      </Placemark>
      <Placemark>
        <name>У8</name>
        <description>Квадрат У8</description>
        <styleUrl>#poly-000000-1000-0</styleUrl>
        <Polygon>
          <outerBoundaryIs>
            <LinearRing>
              <tessellate>1</tessellate>
              <coordinates>
                41.5,55.25,0
                41.6667,55.25,0
                41.6667,55.3333,0
                41.5,55.3333,0
                41.5,55.25,0
              </coordinates>
            </LinearRing>
          </outerBoundaryIs>
        </Polygon>
      </Placemark>
      <Placemark>
        <name>У9</name>
        <description>Квадрат У9</description>
        <styleUrl>#poly-000000-1000-0</styleUrl>
        <Polygon>
          <outerBoundaryIs>
            <LinearRing>
              <tessellate>1</tessellate>
              <coordinates>
                41.6667,55.25,0
                41.8333,55.25,0
                41.8333,55.3333,0
                41.6667,55.3333,0
                41.6667,55.25,0
              </coordinates>
            </LinearRing>
          </outerBoundaryIs>
        </Polygon>
      </Placemark>
      <Placemark>
        <name>У10</name>
        <description>Квадрат У10</description>
        <styleUrl>#poly-000000-1000-0</styleUrl>
        <Polygon>
          <outerBoundaryIs>
            <LinearRing>
              <tessellate>1</tessellate>
              <coordinates>
                41.8333,55.25,0
                42,55.25,0
                42,55.3333,0
                41.8333,55.3333,0
                41.8333,55.25,0
              </coordinates>
            </LinearRing>
          </outerBoundaryIs>
        </Polygon>
      </Placemark>
      <Placemark>
        <name>Ф1</name>
        <description>Квадрат Ф1</description>
        <styleUrl>#poly-000000-1000-0</styleUrl>
        <Polygon>
          <outerBoundaryIs>
            <LinearRing>
              <tessellate>1</tessellate>
              <coordinates>
                40.5833,55.1667,0
                40.75,55.1667,0
                40.75,55.25,0
                40.5833,55.25,0
                40.5833,55.1667,0
              </coordinates>
            </LinearRing>
          </outerBoundaryIs>
        </Polygon>
      </Placemark>
      <Placemark>
        <name>Ф2</name>
        <description>Квадрат Ф2</description>
        <styleUrl>#poly-000000-1000-0</styleUrl>
        <Polygon>
          <outerBoundaryIs>
            <LinearRing>
              <tessellate>1</tessellate>
              <coordinates>
                40.75,55.1667,0
                40.9167,55.1667,0
                40.9167,55.25,0
                40.75,55.25,0
                40.75,55.1667,0
              </coordinates>
            </LinearRing>
          </outerBoundaryIs>
        </Polygon>
      </Placemark>
      <Placemark>
        <name>Ф3</name>
        <description>Квадрат Ф3</description>
        <styleUrl>#poly-000000-1000-0</styleUrl>
        <Polygon>
          <outerBoundaryIs>
            <LinearRing>
              <tessellate>1</tessellate>
              <coordinates>
                41,55.1667,0
                41.1667,55.1667,0
                41.1667,55.25,0
                41,55.25,0
                41,55.1667,0
              </coordinates>
            </LinearRing>
          </outerBoundaryIs>
        </Polygon>
      </Placemark>
      <Placemark>
        <name>Ф4</name>
        <description>Квадрат Ф4</description>
        <styleUrl>#poly-000000-1000-0</styleUrl>
        <Polygon>
          <outerBoundaryIs>
            <LinearRing>
              <tessellate>1</tessellate>
              <coordinates>
                41.1667,55.1667,0
                41.3333,55.1667,0
                41.3333,55.25,0
                41.1667,55.25,0
                41.1667,55.1667,0
              </coordinates>
            </LinearRing>
          </outerBoundaryIs>
        </Polygon>
      </Placemark>
      <Placemark>
        <name>Ф5</name>
        <description>Квадрат Ф5</description>
        <styleUrl>#poly-000000-1000-0</styleUrl>
        <Polygon>
          <outerBoundaryIs>
            <LinearRing>
              <tessellate>1</tessellate>
              <coordinates>
                41.3333,55.1667,0
                41.5,55.1667,0
                41.5,55.25,0
                41.3333,55.25,0
                41.3333,55.1667,0
              </coordinates>
            </LinearRing>
          </outerBoundaryIs>
        </Polygon>
      </Placemark>
      <Placemark>
        <name>Ф6</name>
        <description>Квадрат Ф6</description>
        <styleUrl>#poly-000000-1000-0</styleUrl>
        <Polygon>
          <outerBoundaryIs>
            <LinearRing>
              <tessellate>1</tessellate>
              <coordinates>
                41.5,55.1667,0
                41.6667,55.1667,0
                41.6667,55.25,0
                41.5,55.25,0
                41.5,55.1667,0
              </coordinates>
            </LinearRing>
          </outerBoundaryIs>
        </Polygon>
      </Placemark>
      <Placemark>
        <name>Ф7</name>
        <description>Квадрат Ф7</description>
        <styleUrl>#poly-000000-1000-0</styleUrl>
        <Polygon>
          <outerBoundaryIs>
            <LinearRing>
              <tessellate>1</tessellate>
              <coordinates>
                41.6667,55.1667,0
                41.8333,55.1667,0
                41.8333,55.25,0
                41.6667,55.25,0
                41.6667,55.1667,0
              </coordinates>
            </LinearRing>
          </outerBoundaryIs>
        </Polygon>
      </Placemark>
      <Placemark>
        <name>Ф8</name>
        <description>Квадрат Ф8</description>
        <styleUrl>#poly-000000-1000-0</styleUrl>
        <Polygon>
          <outerBoundaryIs>
            <LinearRing>
              <tessellate>1</tessellate>
              <coordinates>
                41.8333,55.1667,0
                42,55.1667,0
                42,55.25,0
                41.8333,55.25,0
                41.8333,55.1667,0
              </coordinates>
            </LinearRing>
          </outerBoundaryIs>
        </Polygon>
      </Placemark>
      <Placemark>
        <name>Х1</name>
        <description>Квадрат Х1</description>
        <styleUrl>#poly-000000-1000-0</styleUrl>
        <Polygon>
          <outerBoundaryIs>
            <LinearRing>
              <tessellate>1</tessellate>
              <coordinates>
                41.5,55.0833,0
                41.6667,55.0833,0
                41.6667,55.1667,0
                41.5,55.1667,0
                41.5,55.0833,0
              </coordinates>
            </LinearRing>
          </outerBoundaryIs>
        </Polygon>
      </Placemark>
      <Placemark>
        <name>Х2</name>
        <description>Квадрат Х2</description>
        <styleUrl>#poly-000000-1000-0</styleUrl>
        <Polygon>
          <outerBoundaryIs>
            <LinearRing>
              <tessellate>1</tessellate>
              <coordinates>
                41.6667,55.0833,0
                41.8333,55.0833,0
                41.8333,55.1667,0
                41.6667,55.1667,0
                41.6667,55.0833,0
              </coordinates>
            </LinearRing>
          </outerBoundaryIs>
        </Polygon>
      </Placemark>
    </Folder>
  </Document>
</kml>
